# Supplementary material for: Tuning the Morphology in the Nanoscale of NH4CN Polymers Synthesized by Microwave Radiation: A Comparative Study
Source: MDPI journal article supplement (doi:10.3390/polym14010057), 2021-12-24
Supplement: s1 [file s1]

# **TUNING THE MORPHOLOGY IN THE NANOSCALE OF NH<sub>4</sub>CN POLYMERS SYNTHESIZED BY MICROWAVE RADIATION: A COMPARATIVE STUDY**

Cristina Pérez-Fernández, Pilar Valles, Elena González-Toril, Eva Mateo-Martí,  
José L. de la Fuente, Marta Ruiz-Bermejo

## **SUPPLEMENTARY INFORMATION**

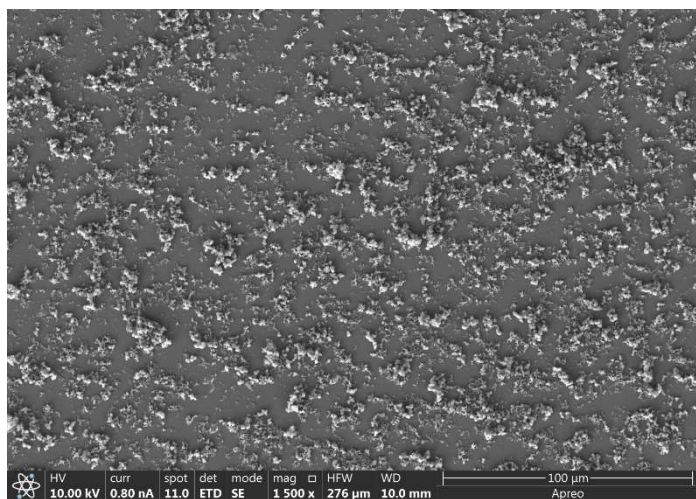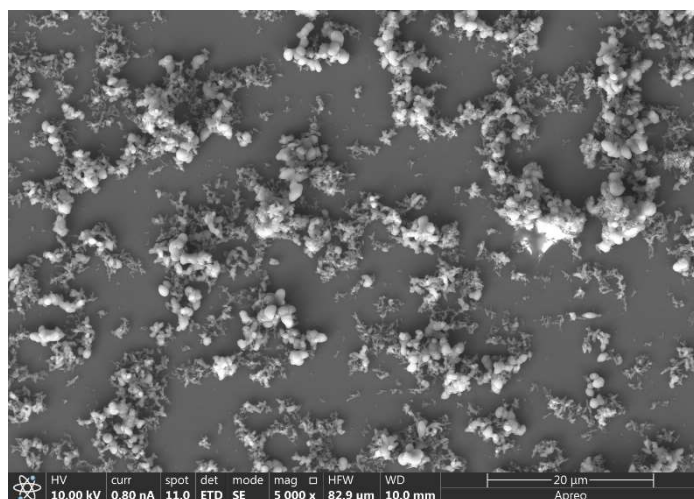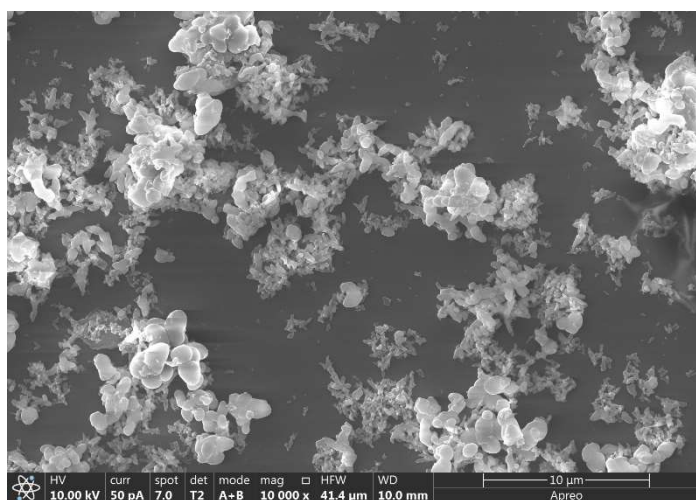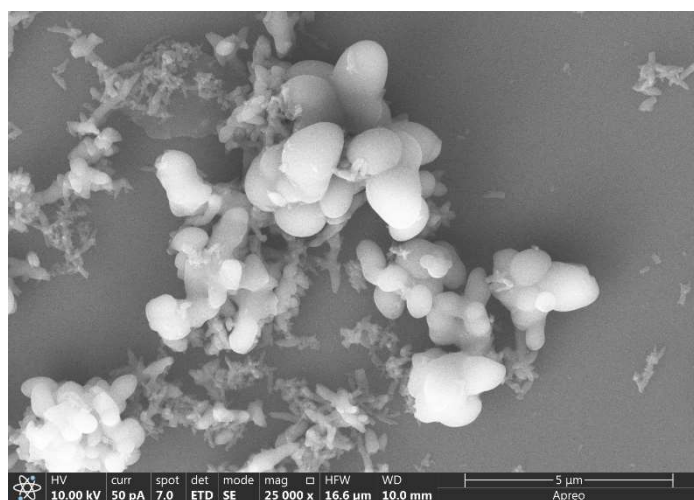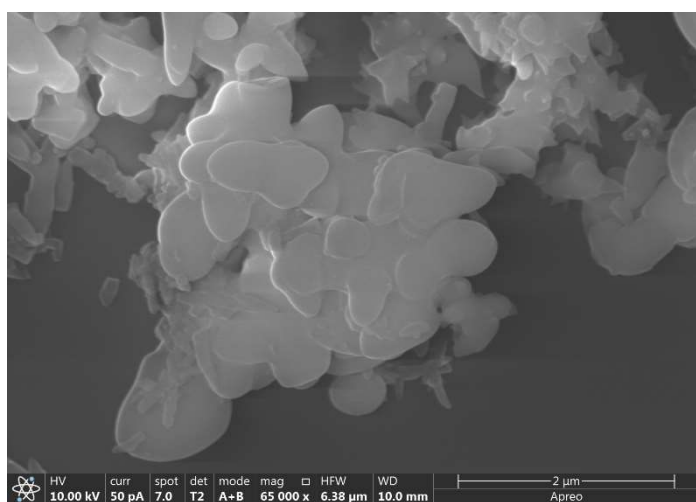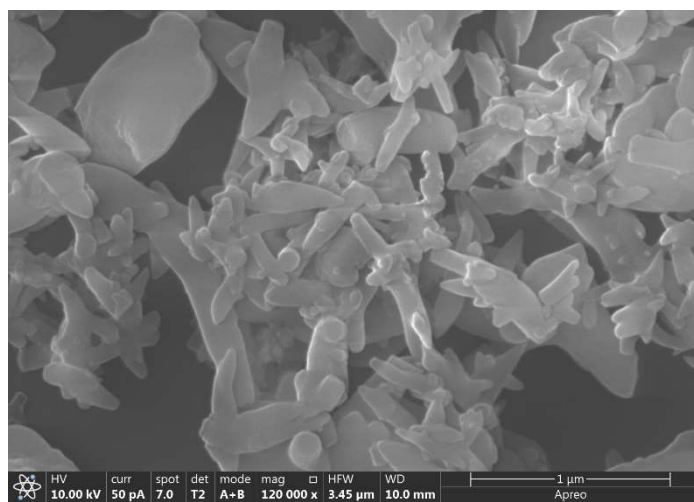

**Figure S1.** SEM images of the  $\text{NH}_4\text{CN}$  polymer 1.

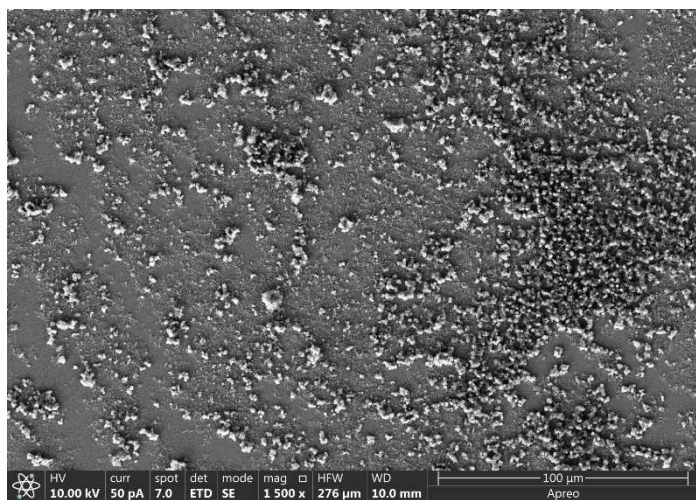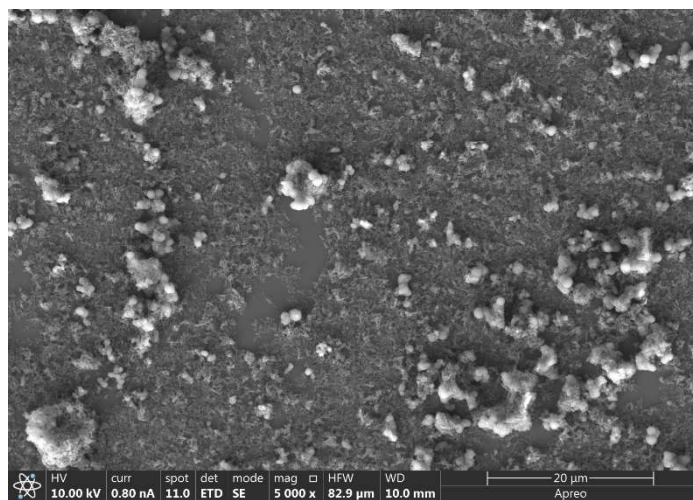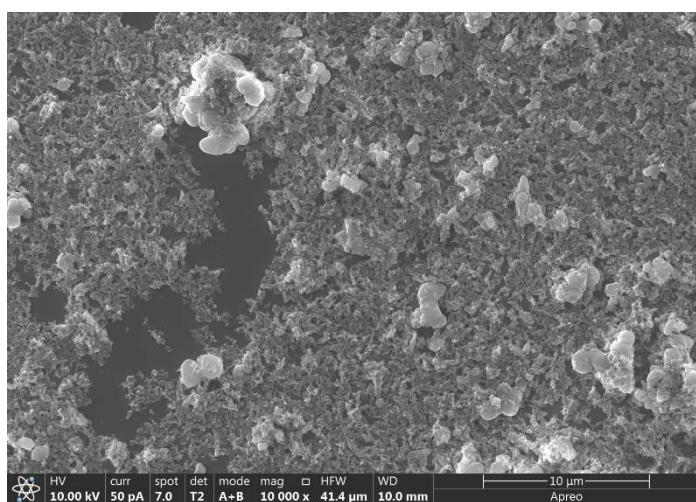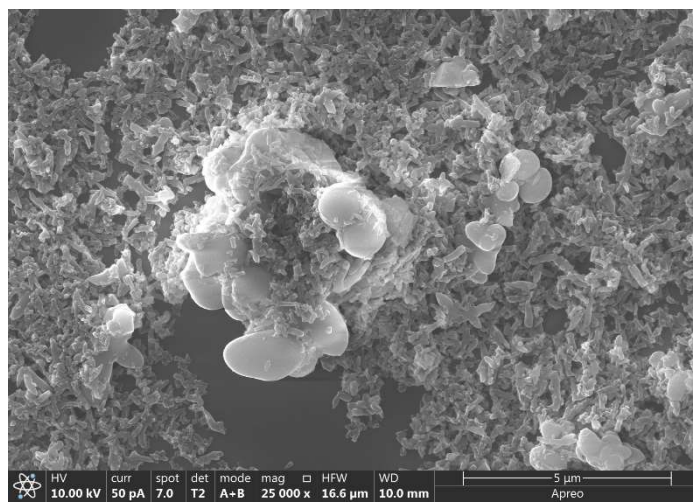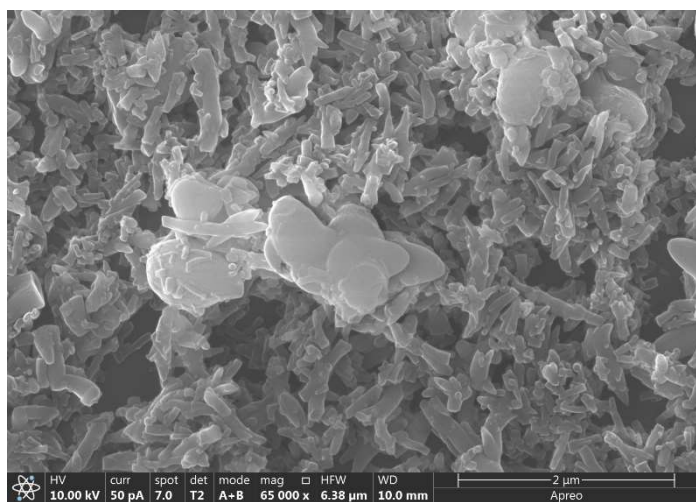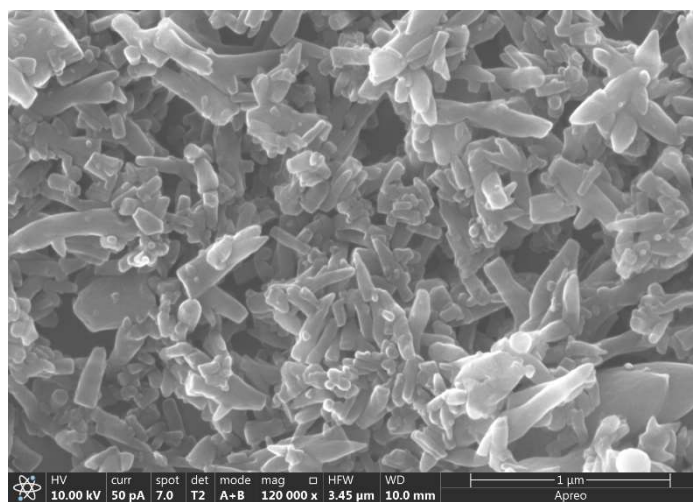

**Figure S2.** SEM images of the  $\text{NH}_4\text{CN}$  polymer **2**.

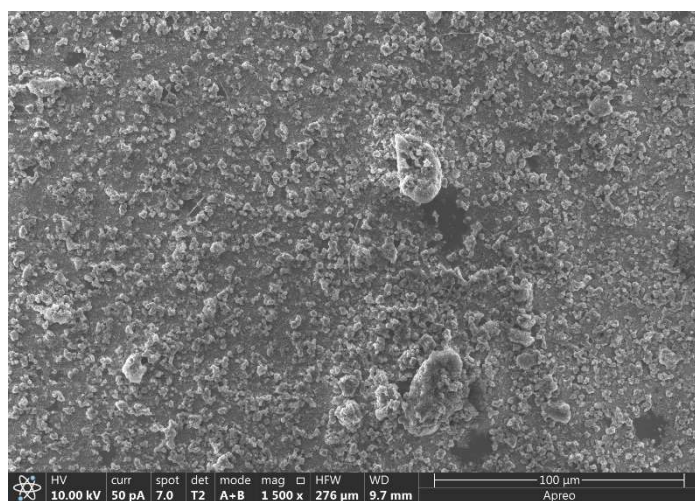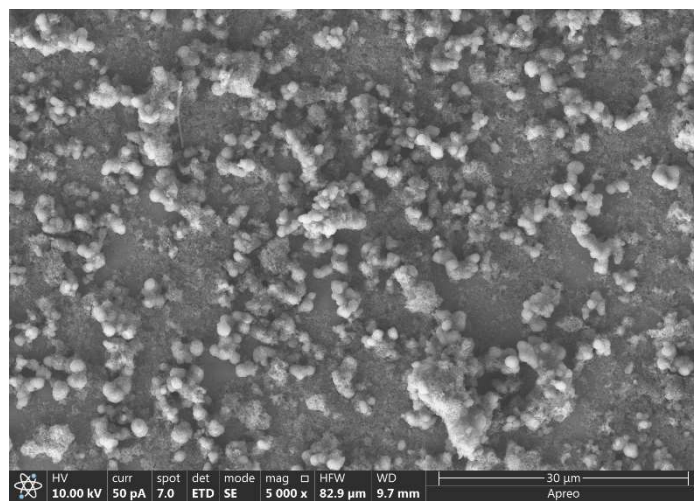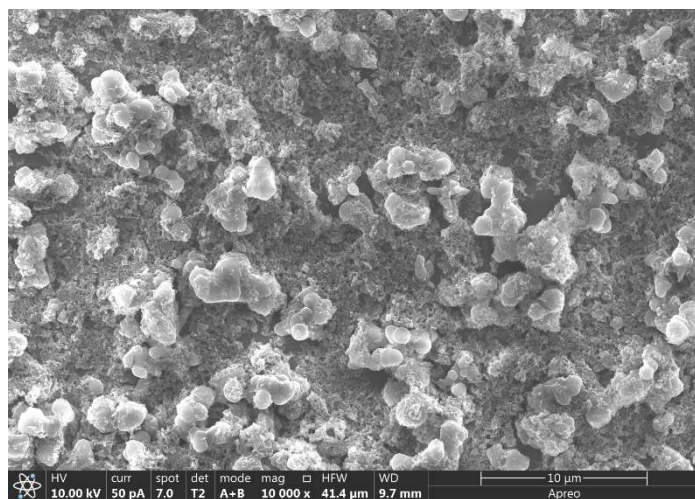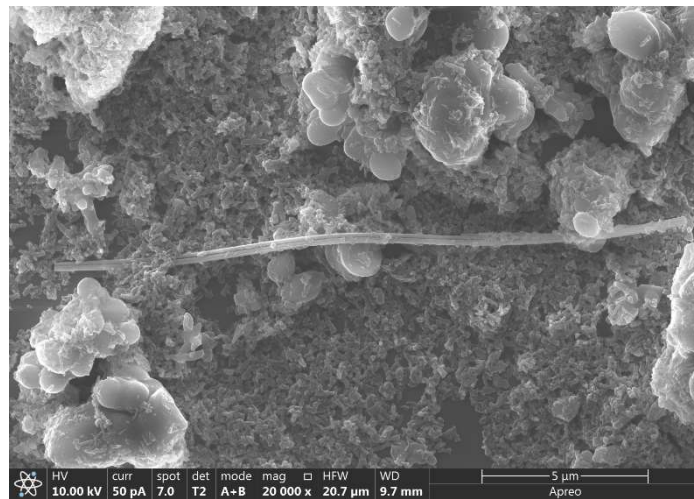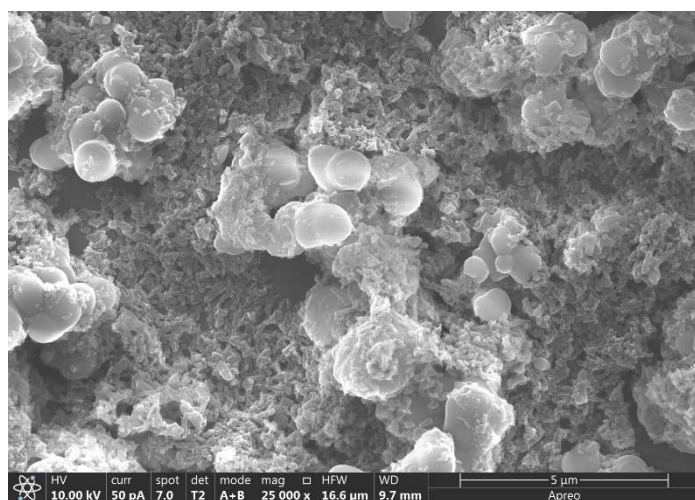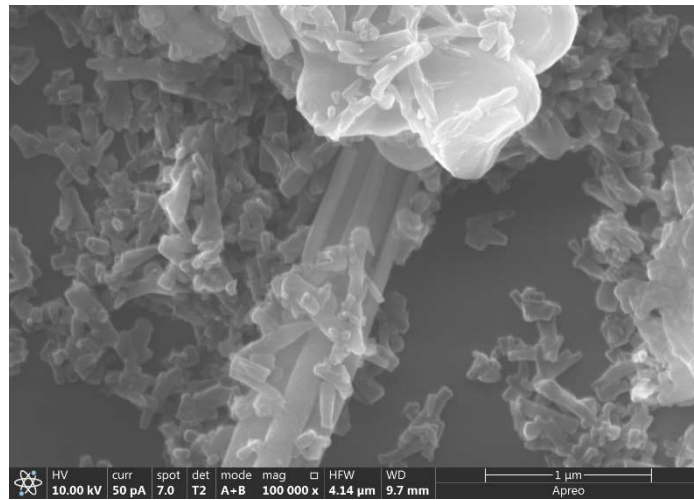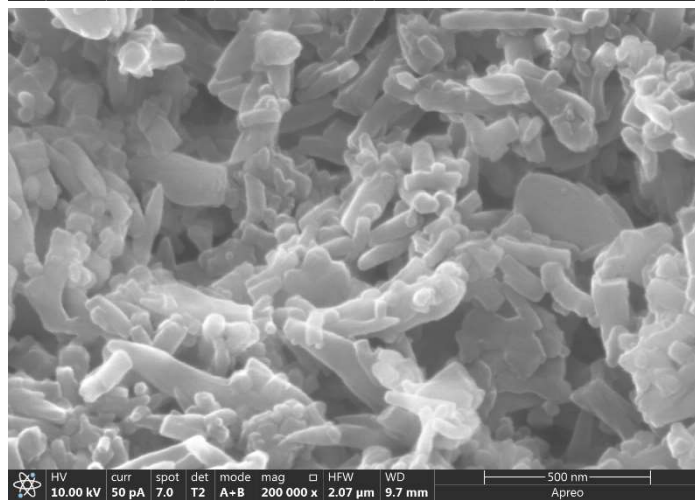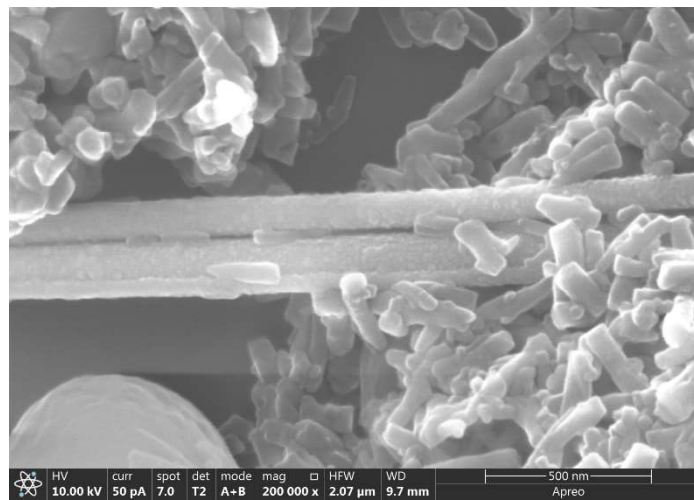

**Figure S3.** SEM images of the  $\text{NH}_4\text{CN}$  polymer **3**.

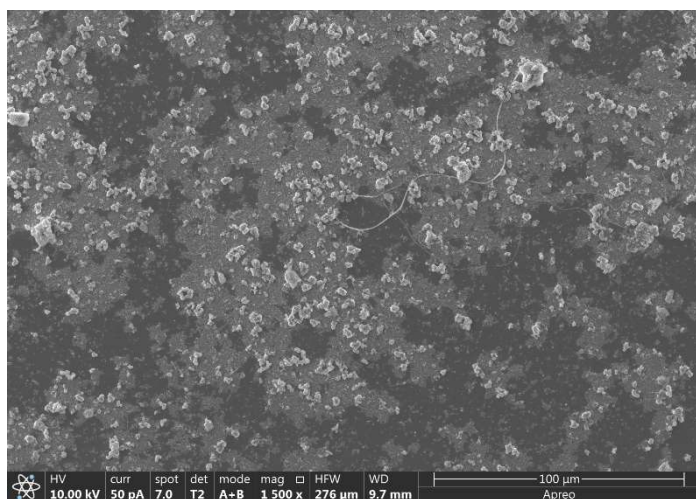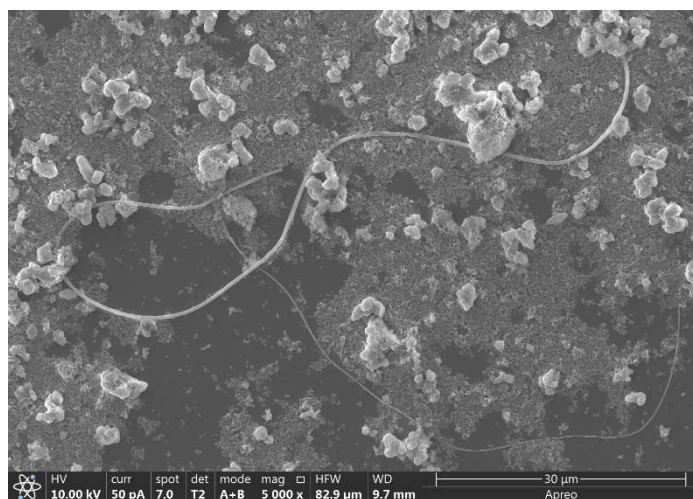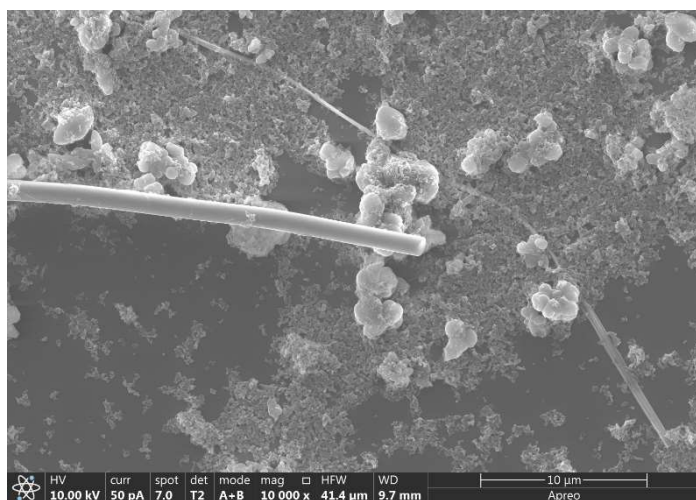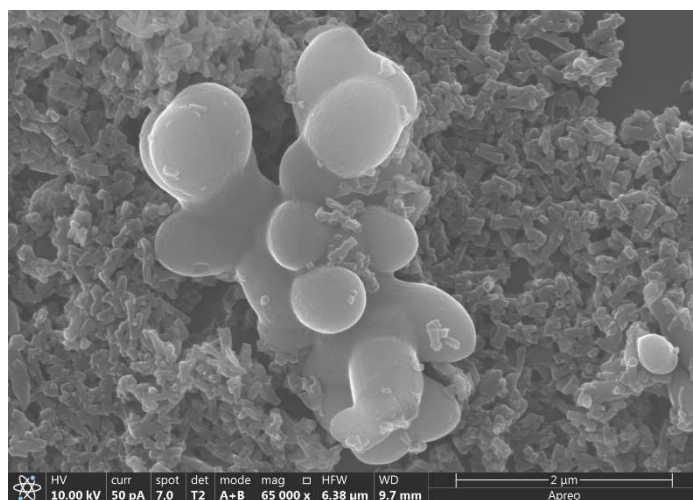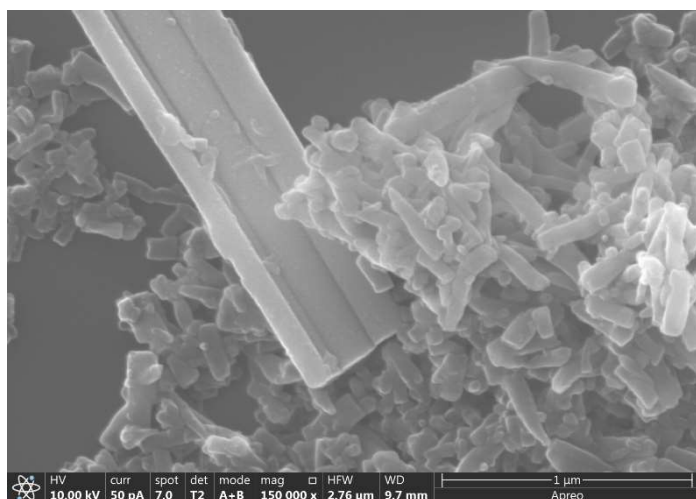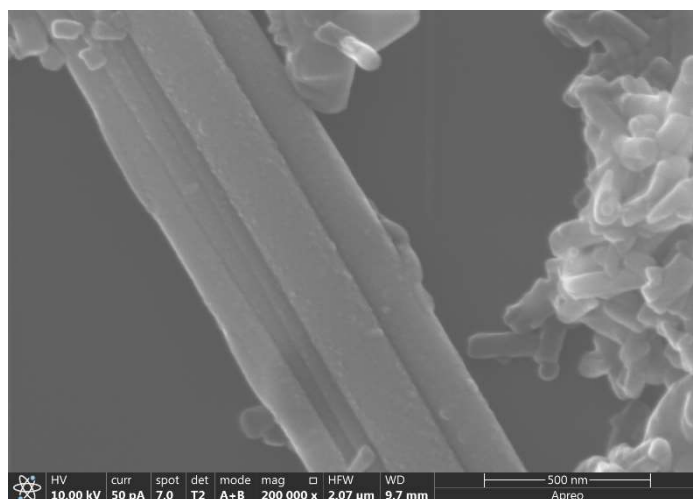

**Figure S4.** SEM images of the NH<sub>4</sub>CN polymer **4**.

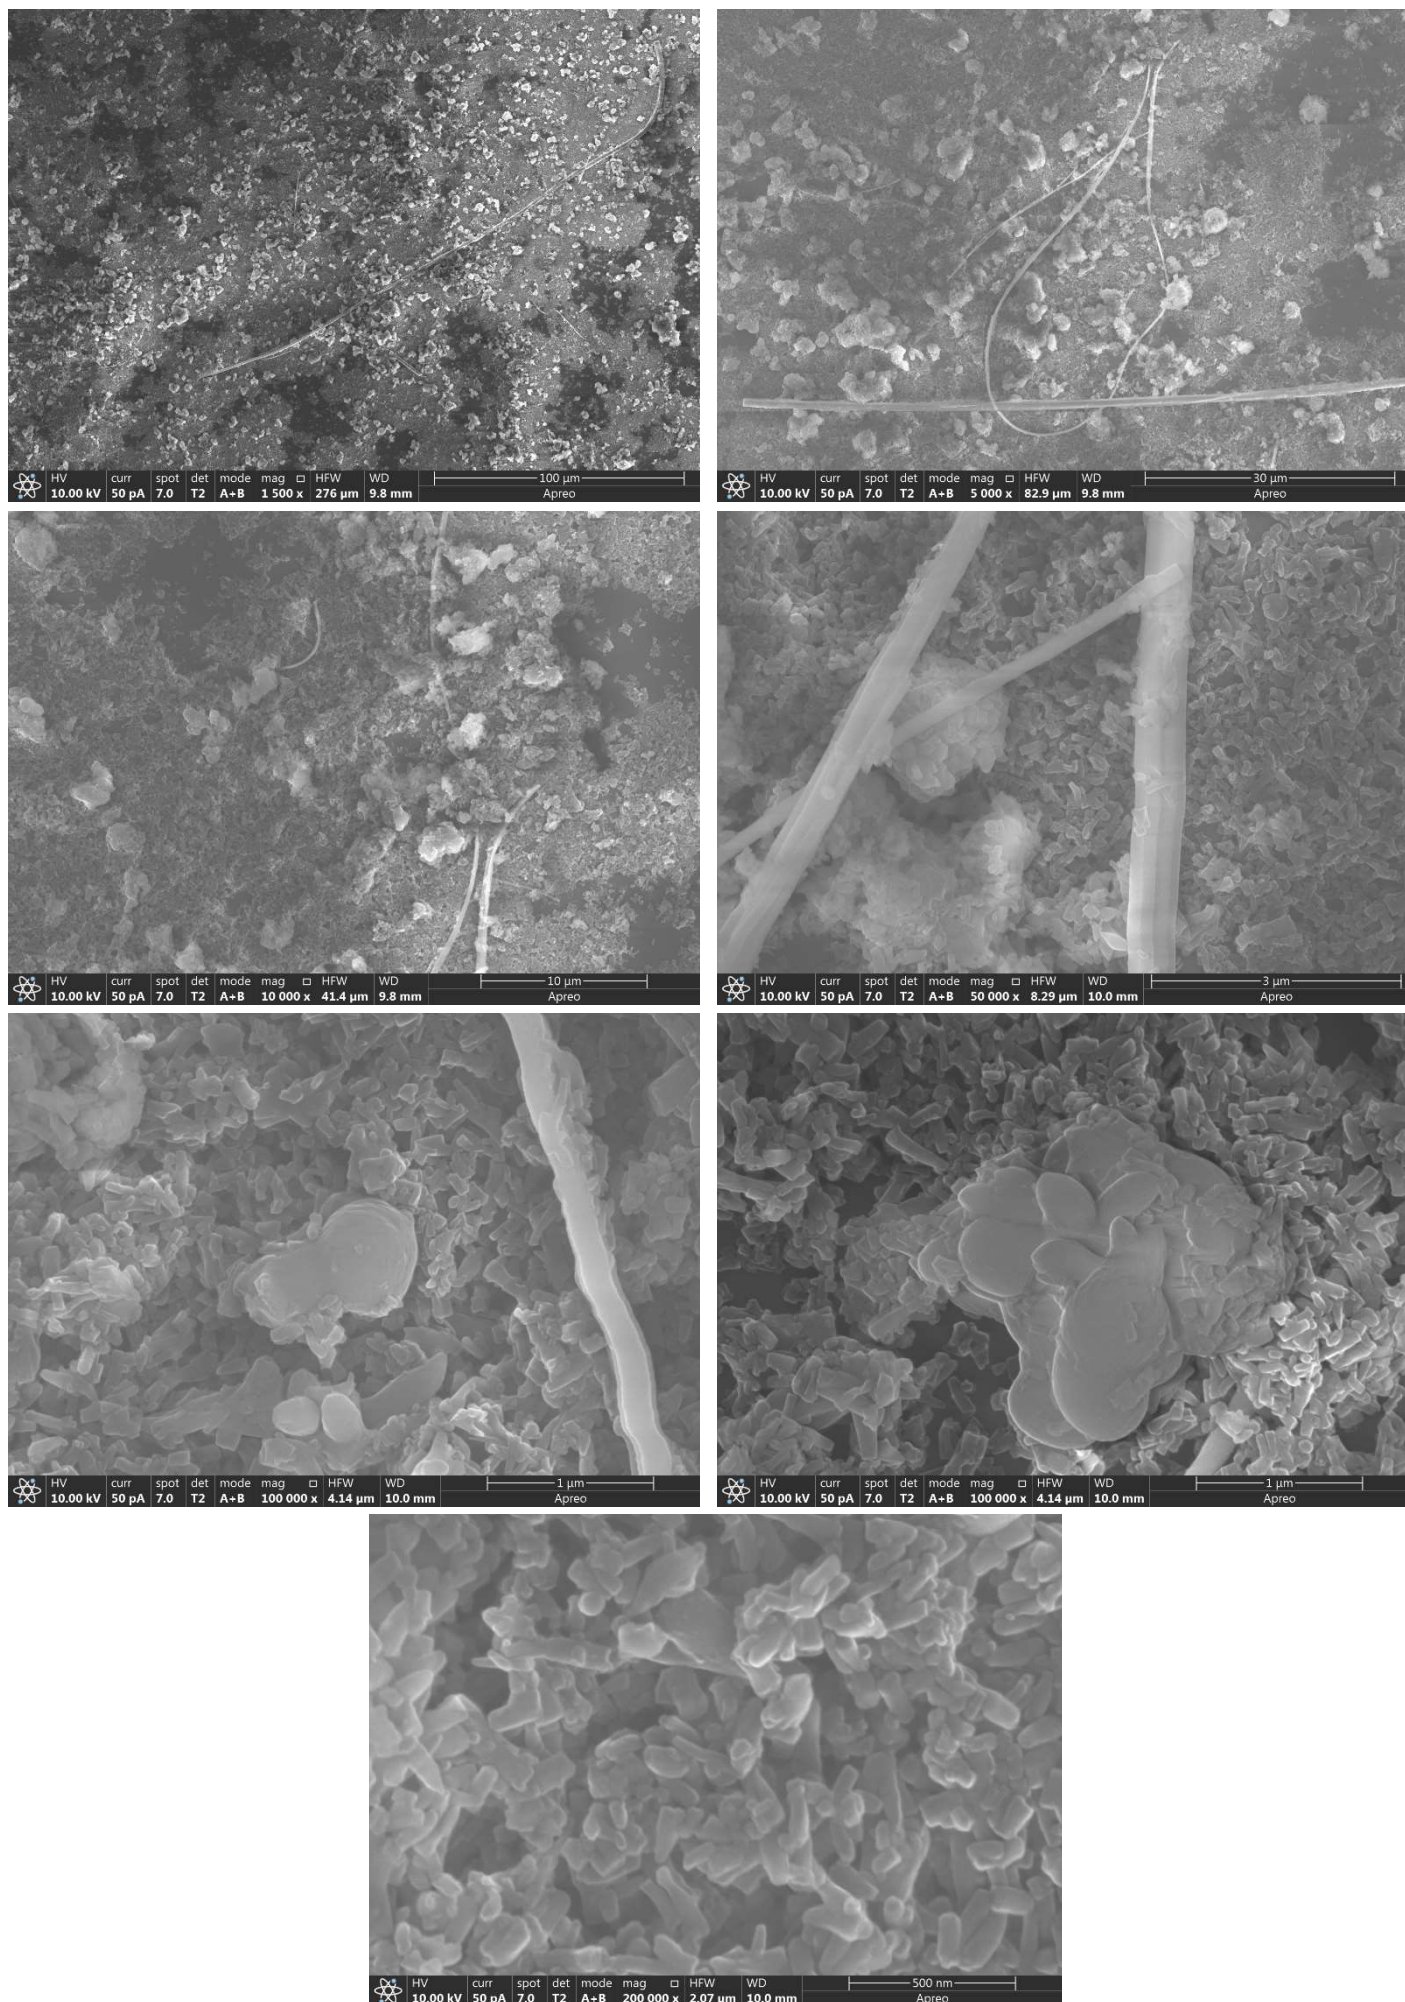

**Figure S5.** SEM images of the  $\text{NH}_4\text{CN}$  polymer **5**.

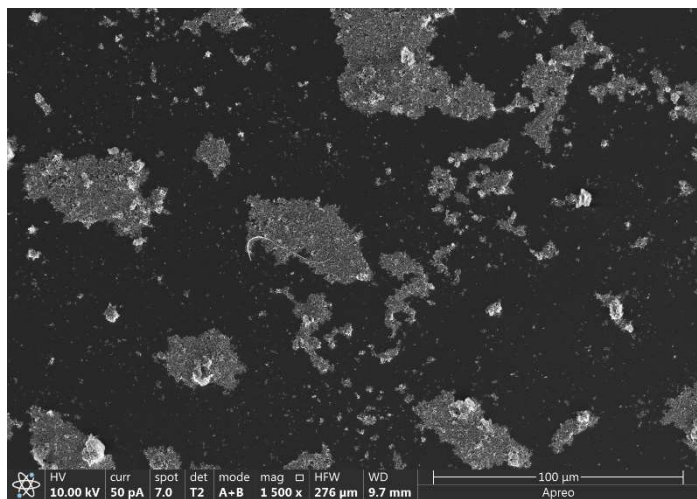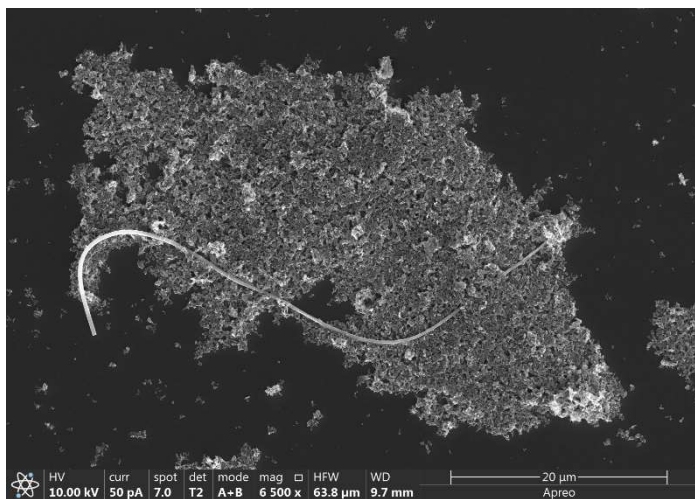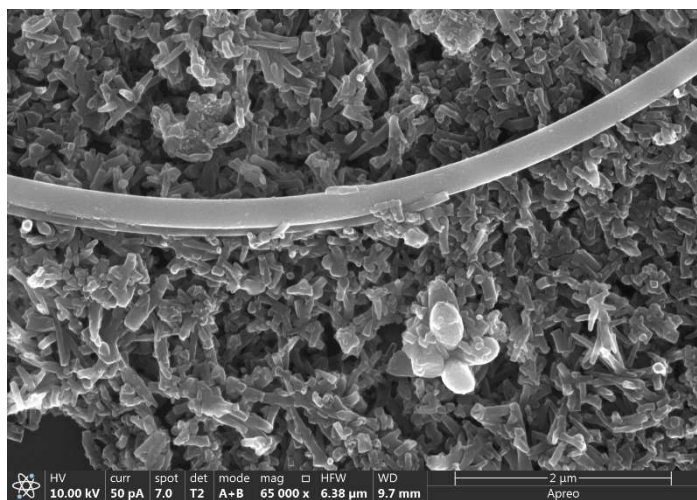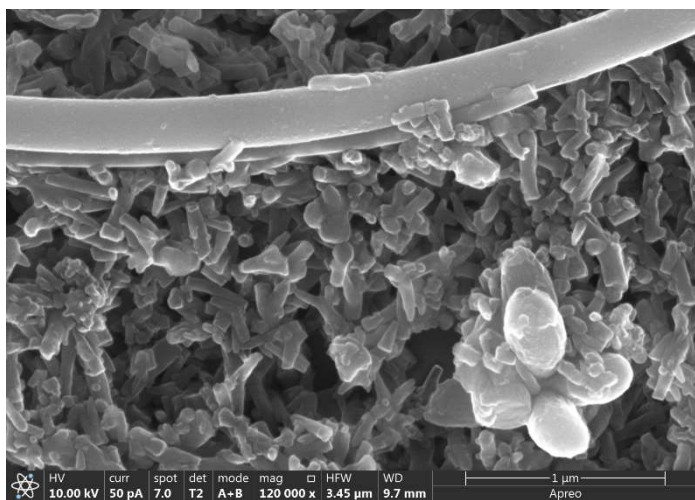

**Figure S6.** SEM images of the  $\text{NH}_4\text{CN}$  polymer **6**.

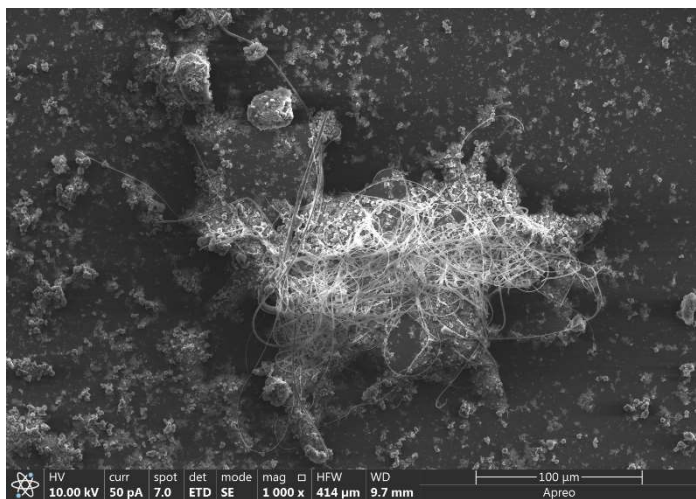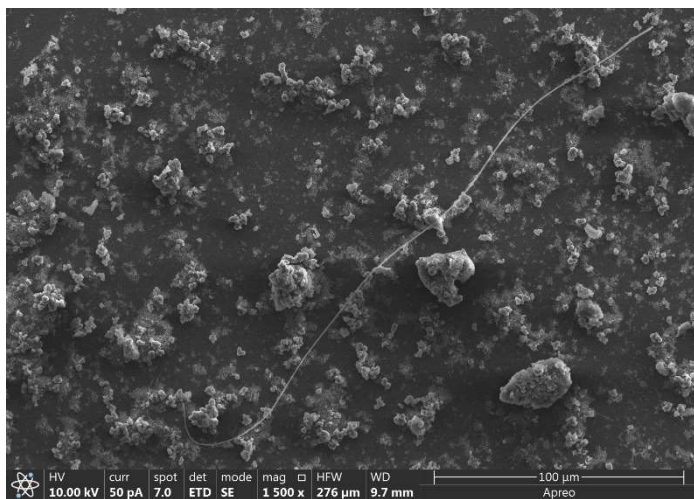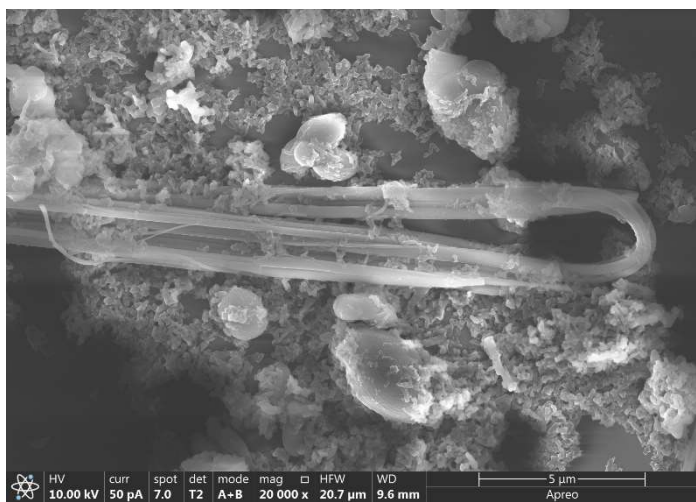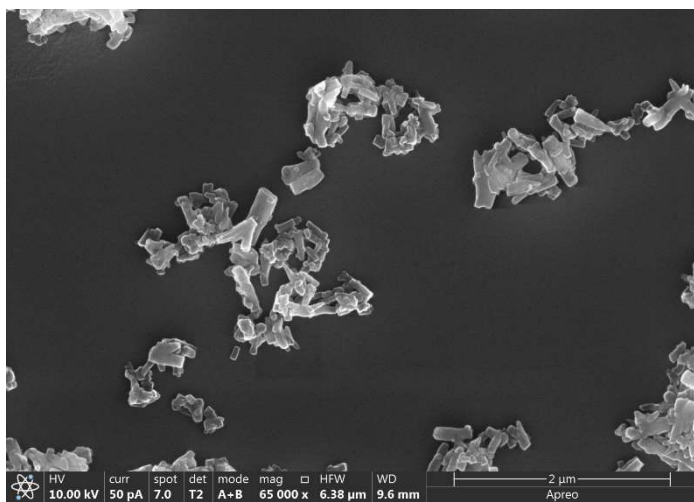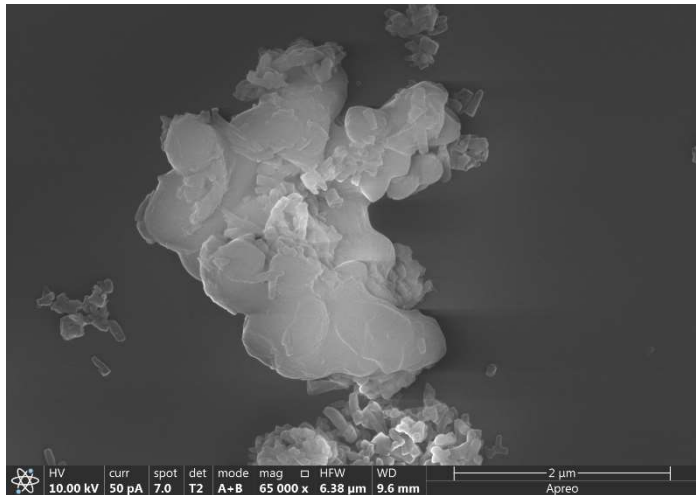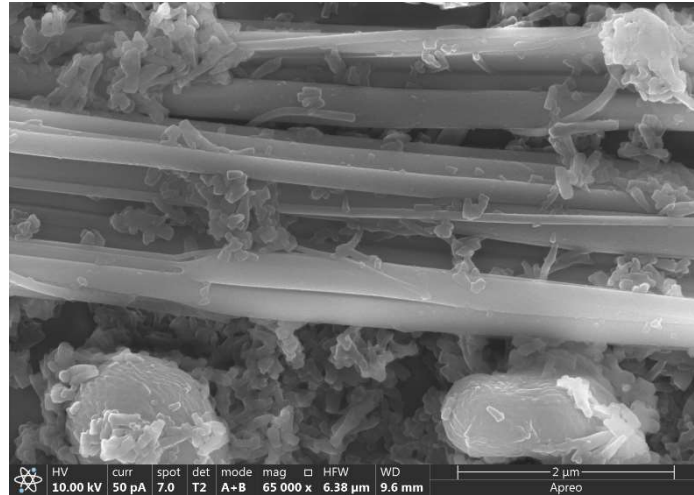

**Figure S7.** SEM images of the  $\text{NH}_4\text{CN}$  polymer **7**.

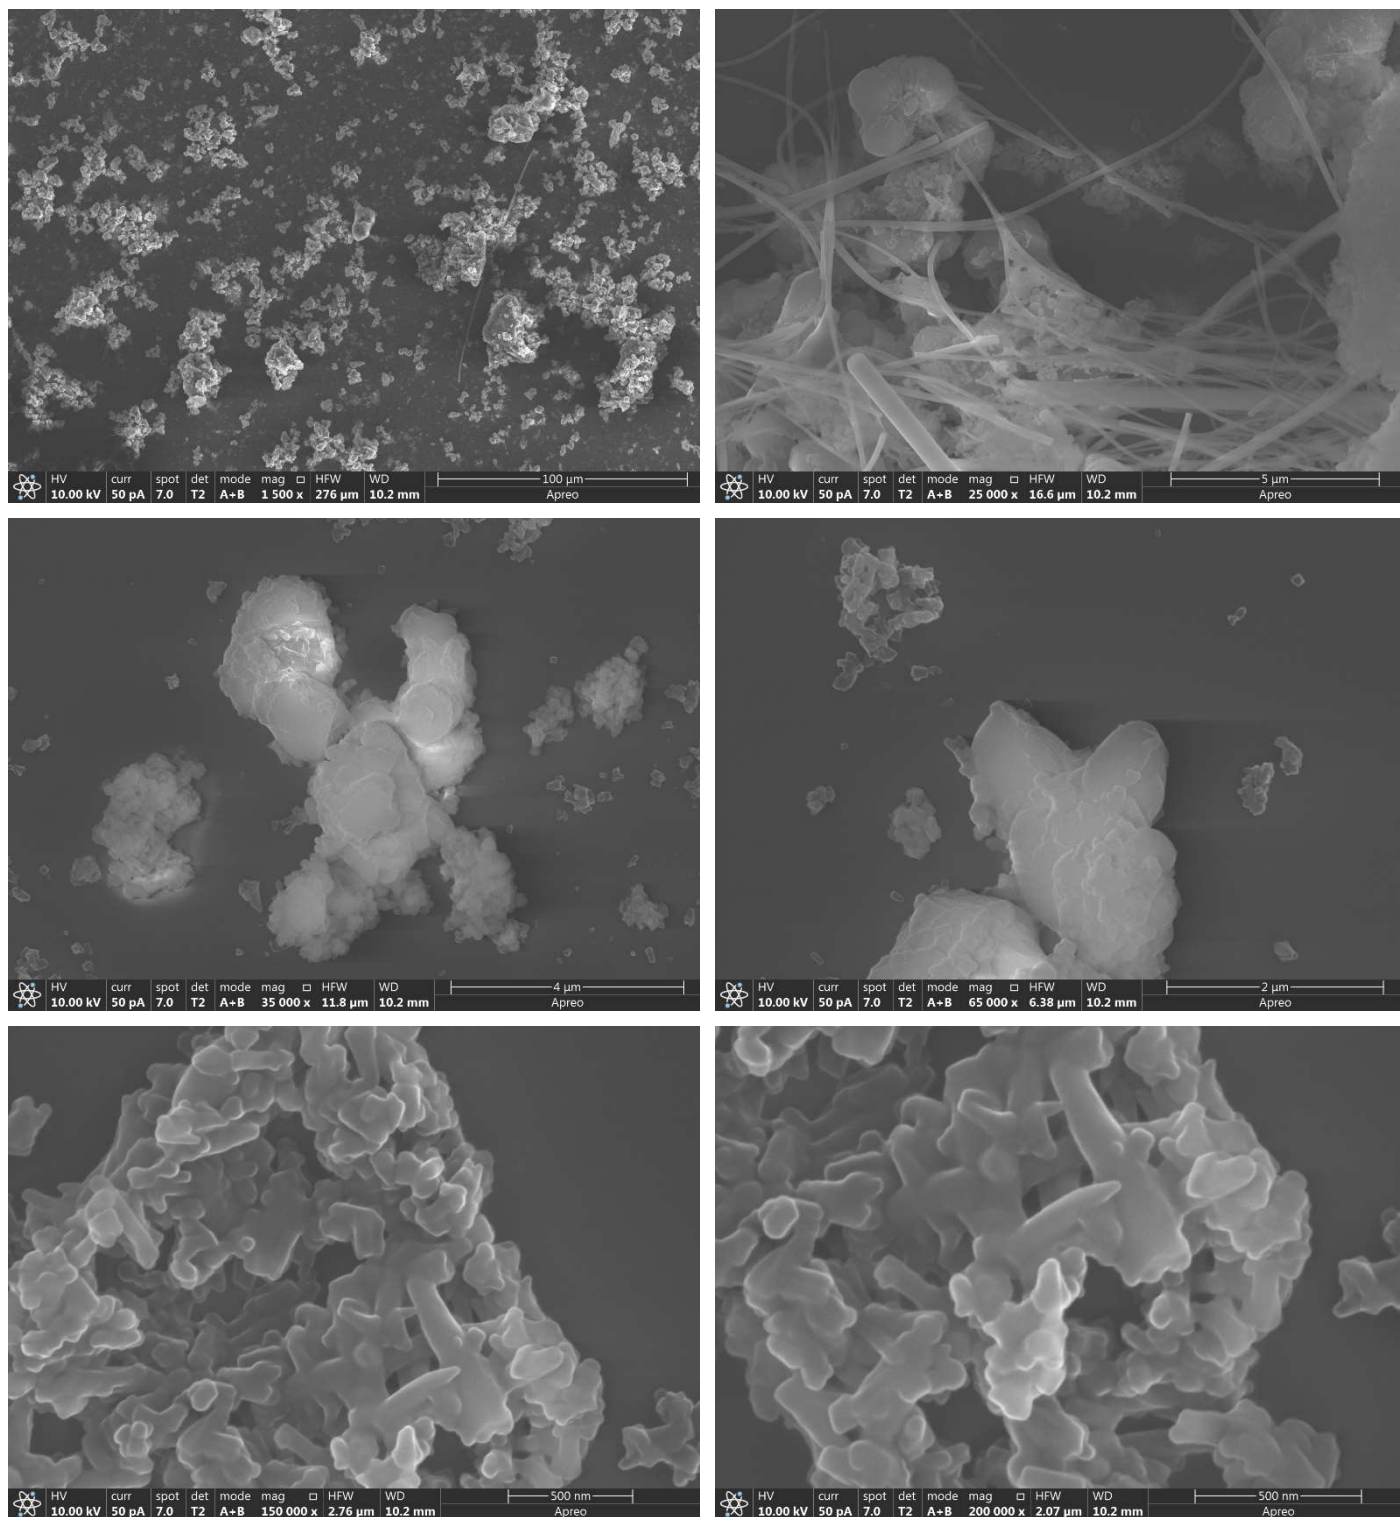

**Figure S8.** SEM images of the  $\text{NH}_4\text{CN}$  polymer 8.

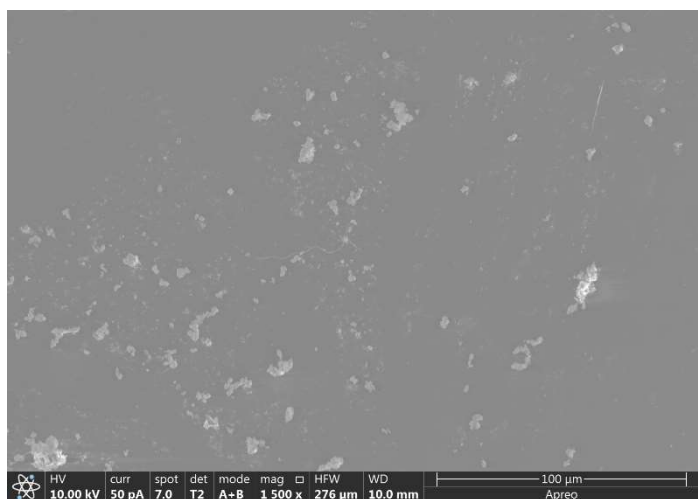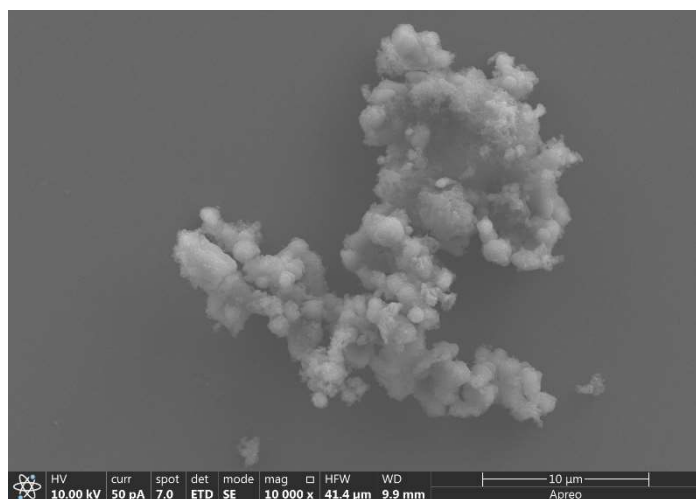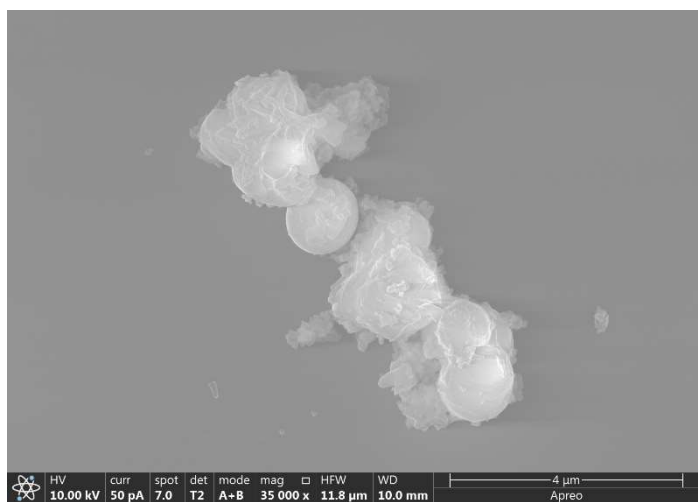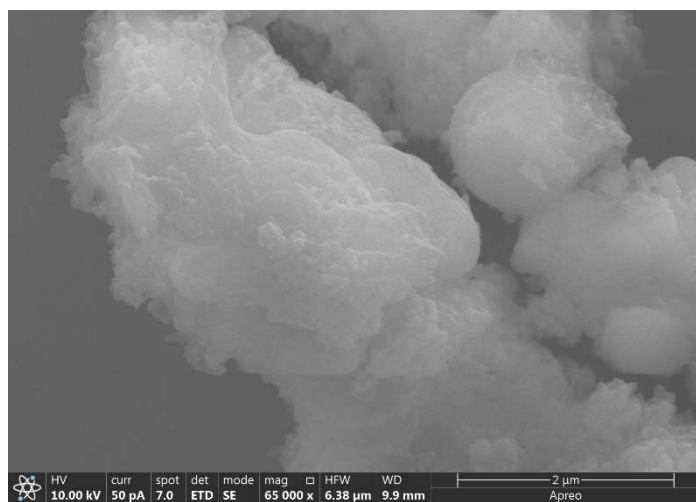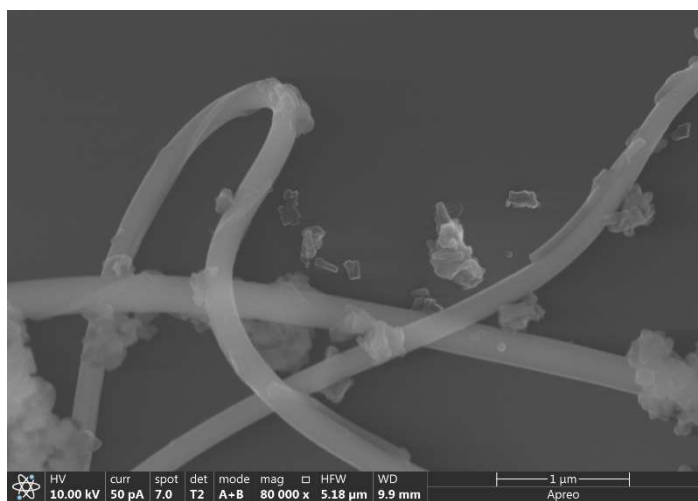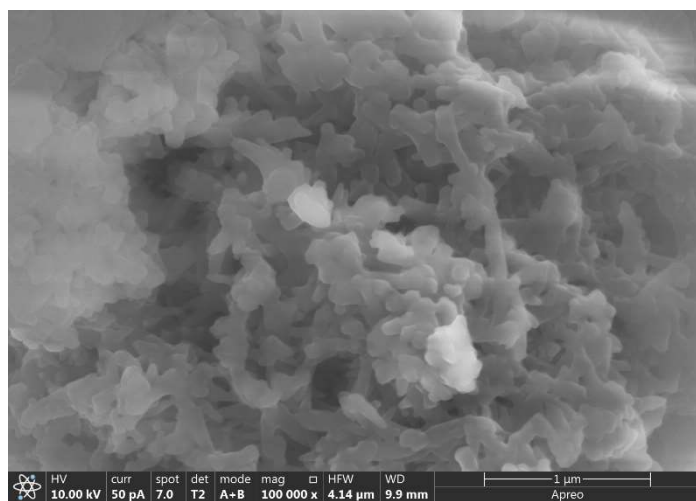

**Figure S9.** SEM images of the  $\text{NH}_4\text{CN}$  polymer 9.

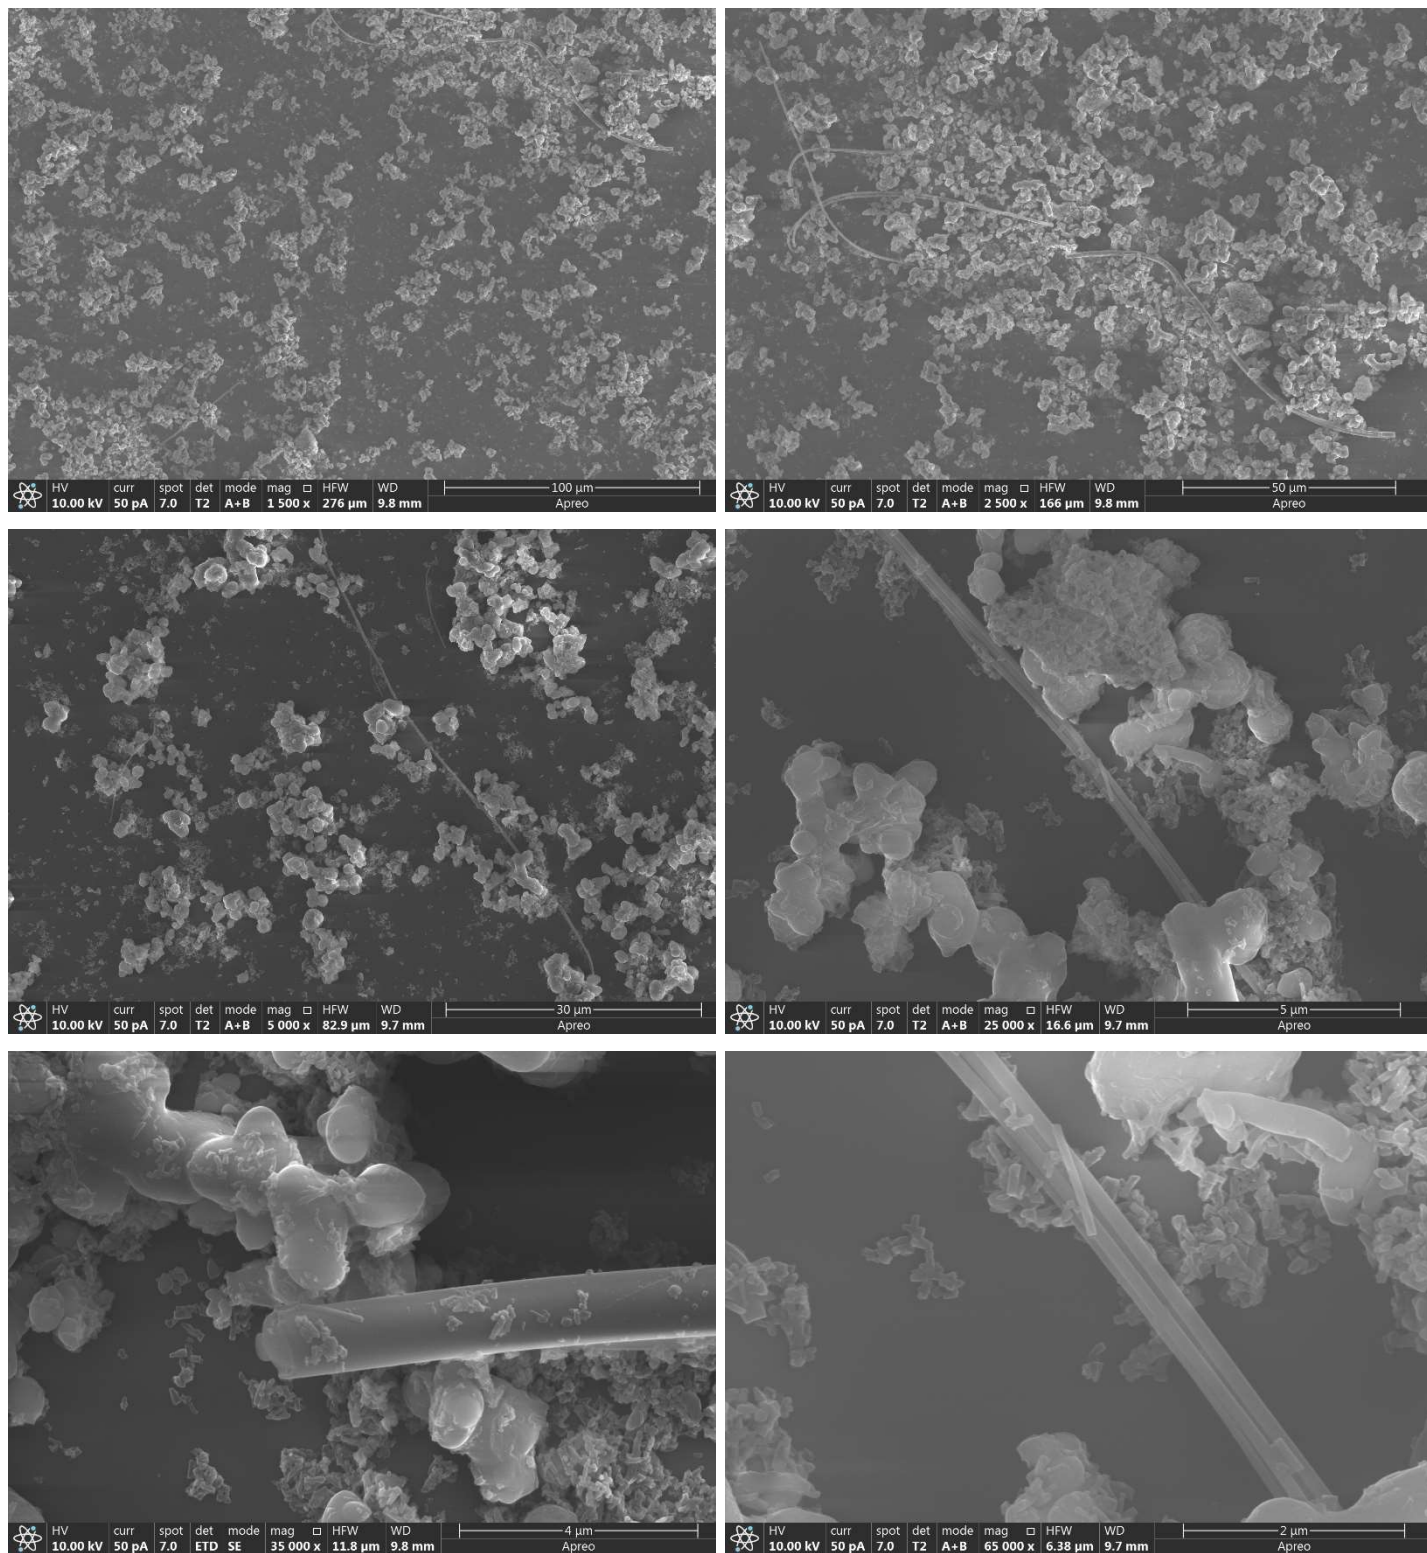

**Figure S10.** SEM images of the  $\text{NH}_4\text{CN}$  polymer synthesized at 170 °C with a reaction time of 5 min.

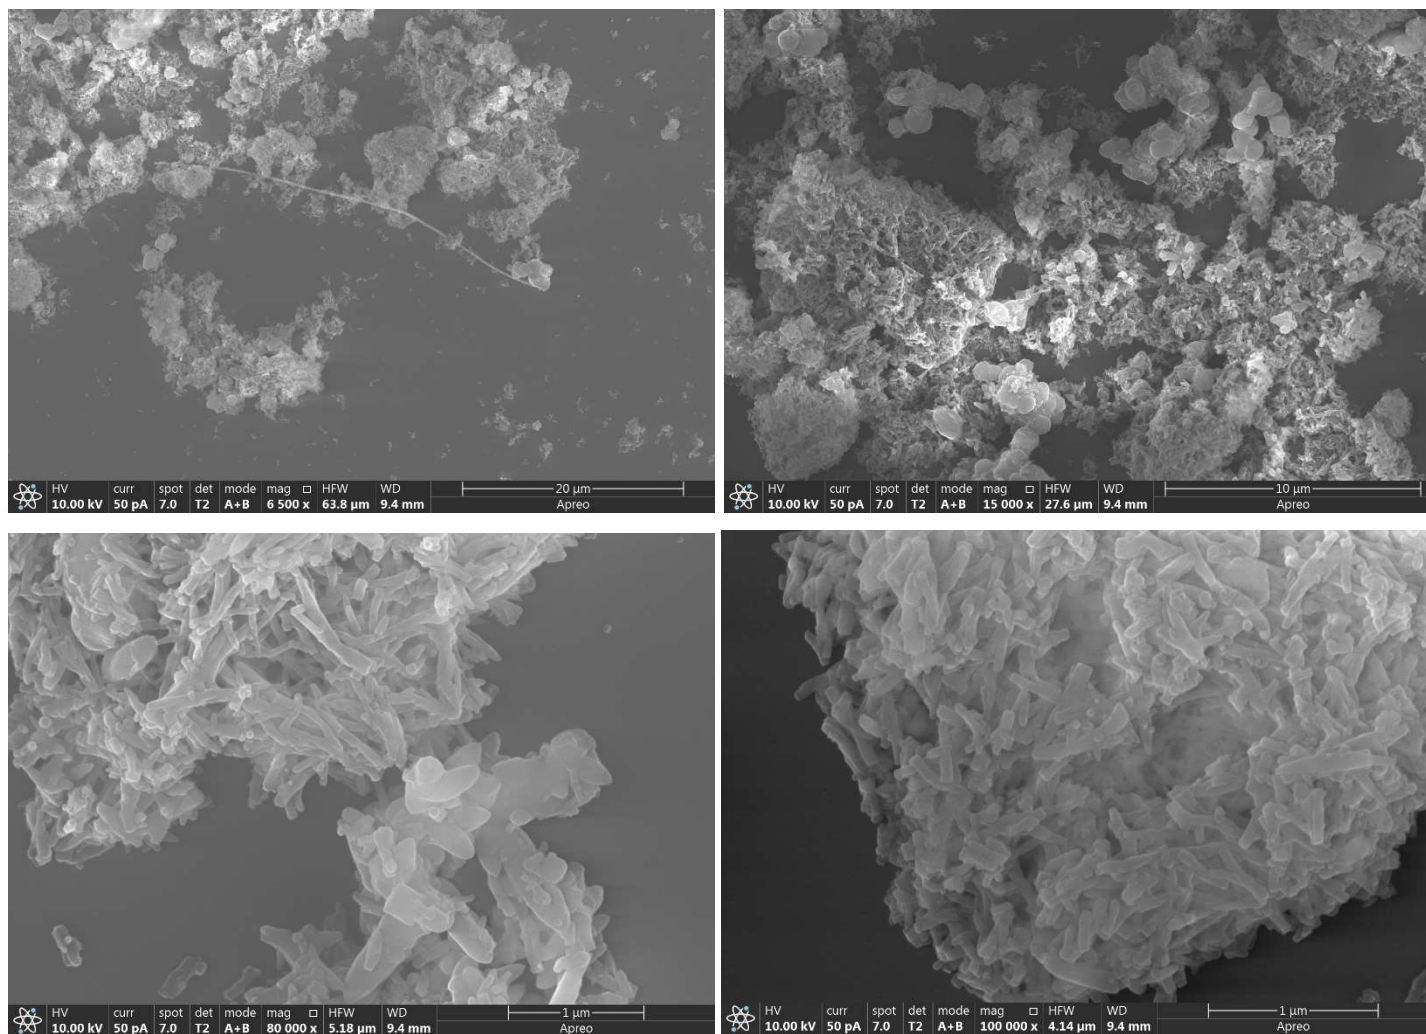

**Figure S11.** SEM images of the  $\text{NH}_4\text{CN}$  polymer synthesized at 170 °C with a reaction time of 36 min.

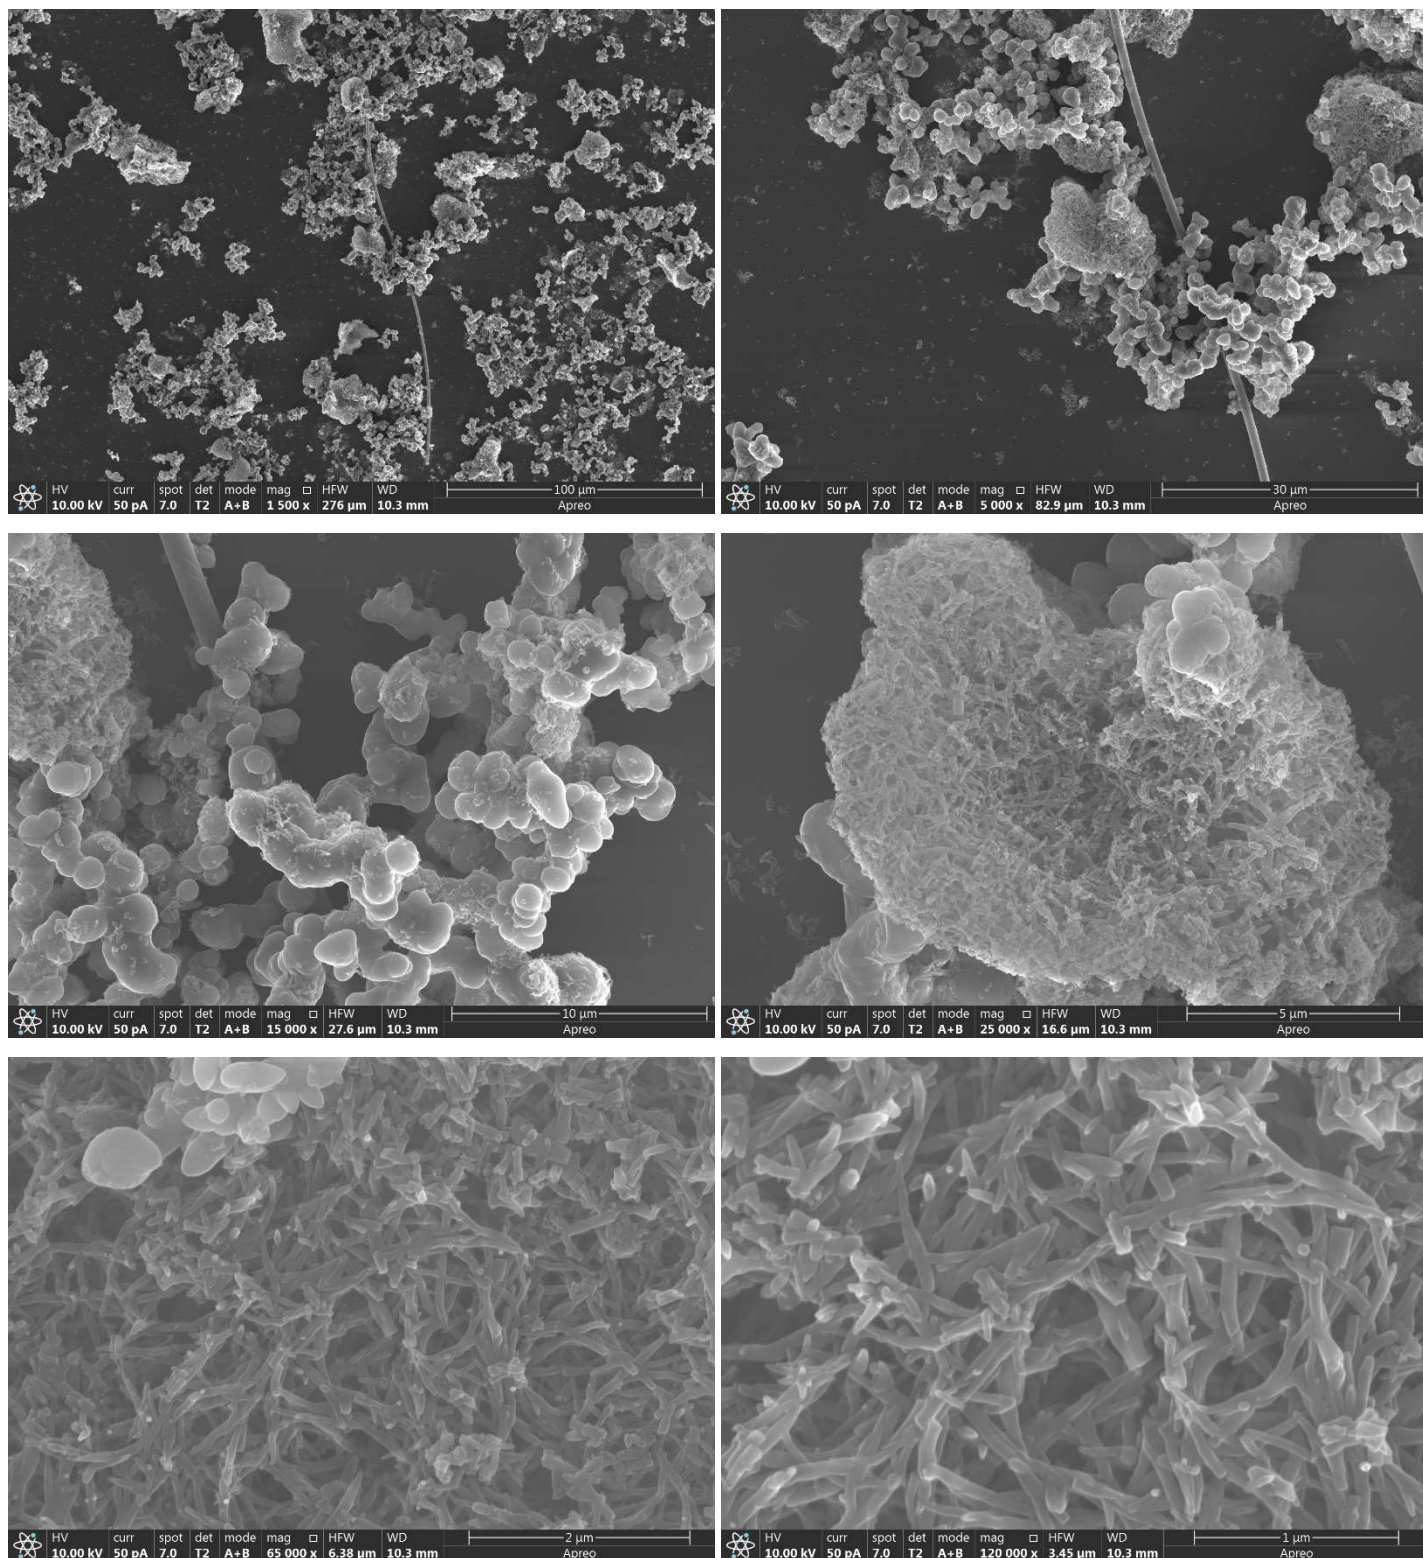

**Figure S12.** SEM images of the  $\text{NH}_4\text{CN}$  polymer synthesized at 170  $^{\circ}\text{C}$  with a reaction time of 52 min.

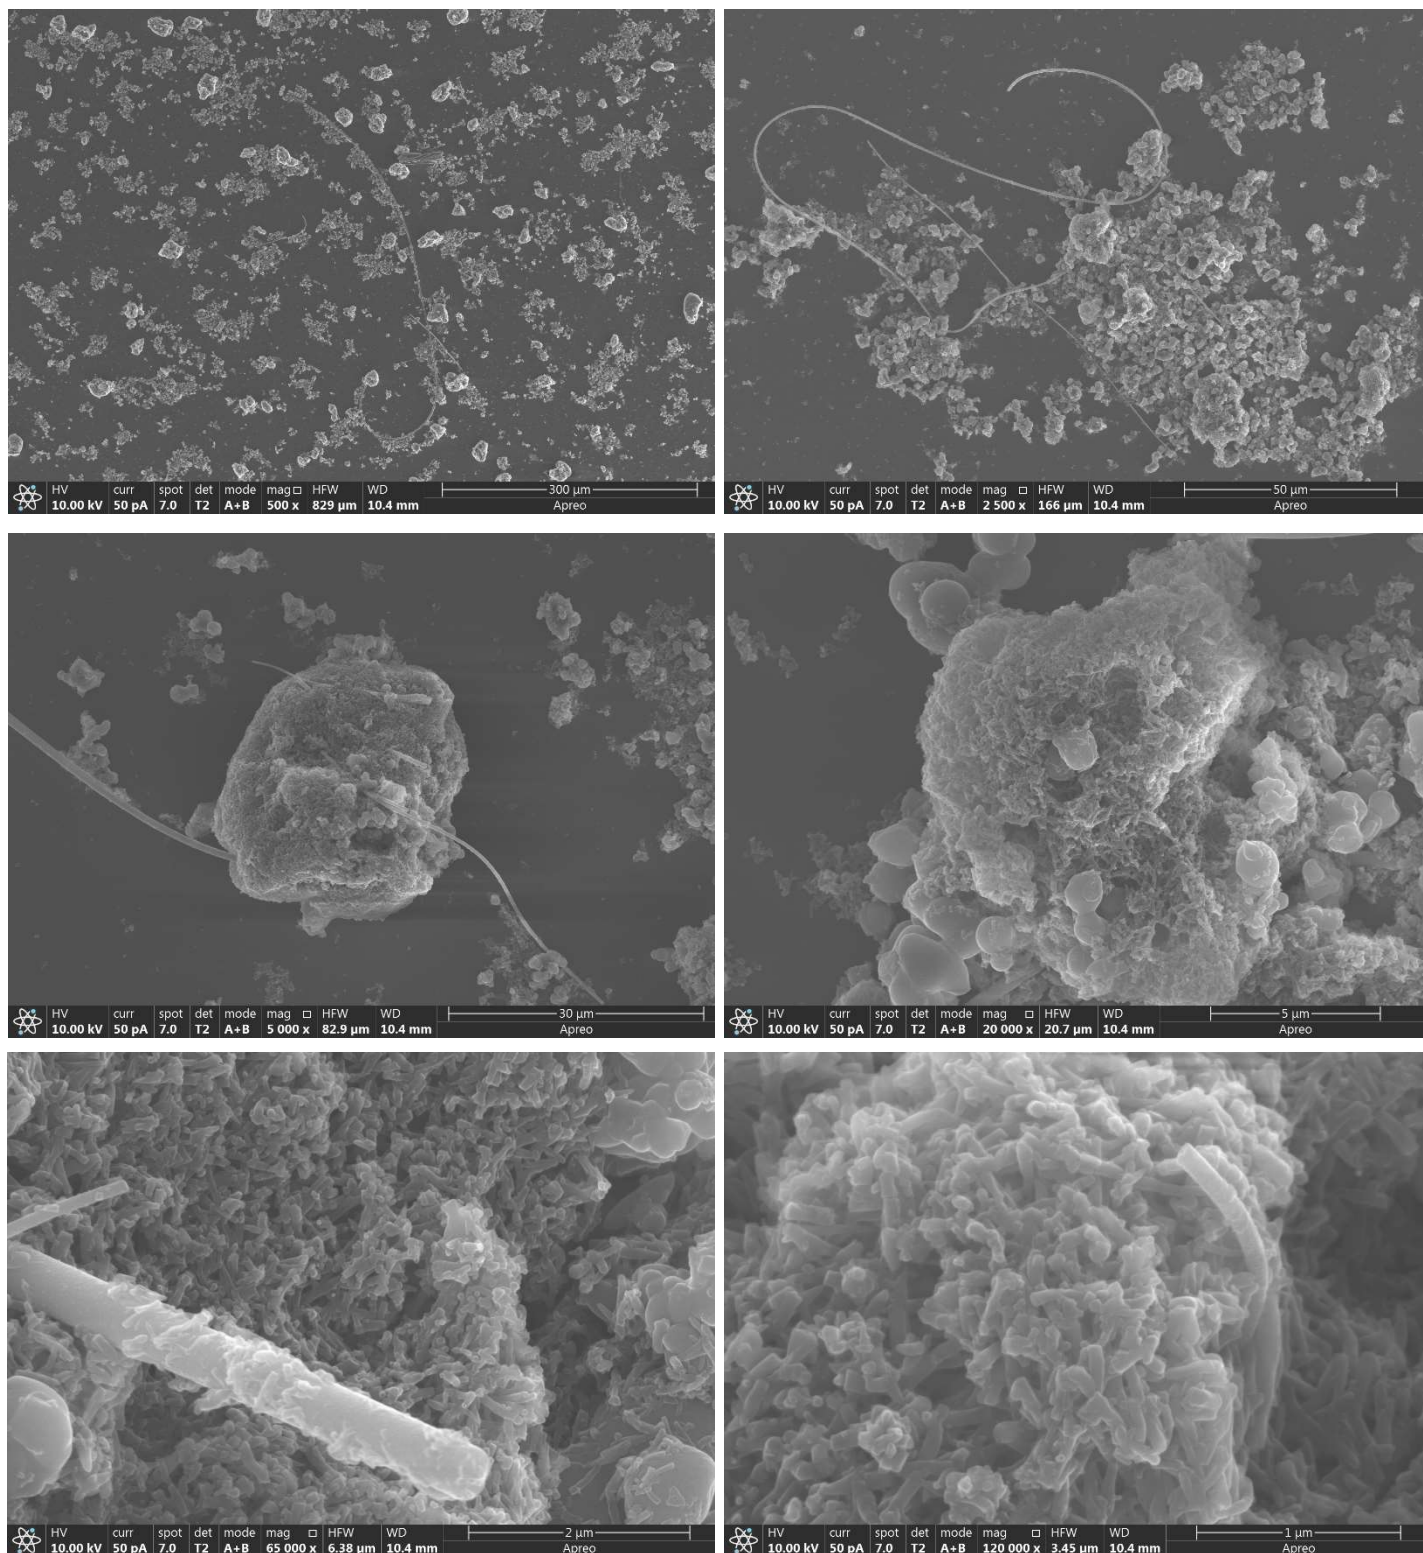

**Figure S13.** SEM images of the  $\text{NH}_4\text{CN}$  polymer synthesized at 170  $^{\circ}\text{C}$  with a reaction time of 58 min.

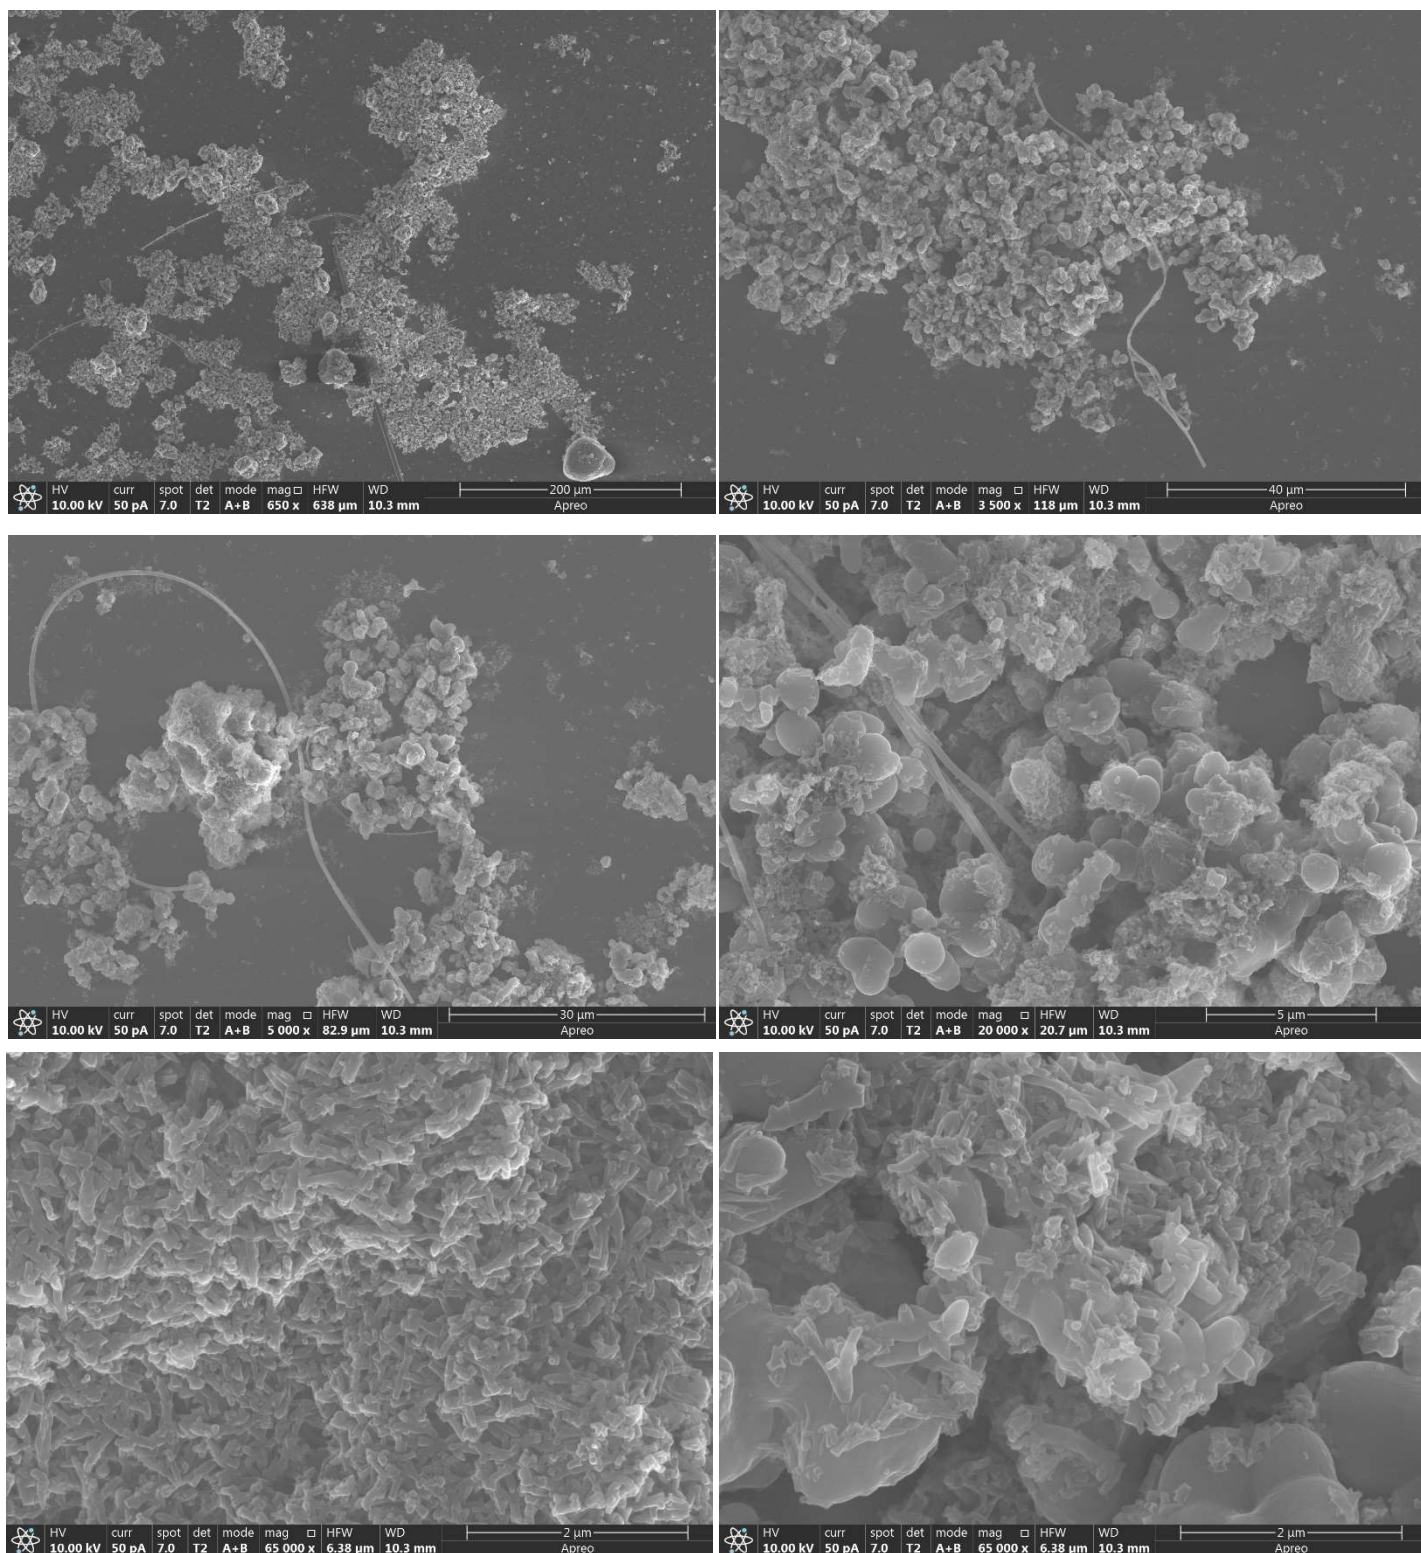

**Figure S14.** SEM images of the  $\text{NH}_4\text{CN}$  polymer synthesized at 170  $^{\circ}\text{C}$  with a reaction time of 72 min.

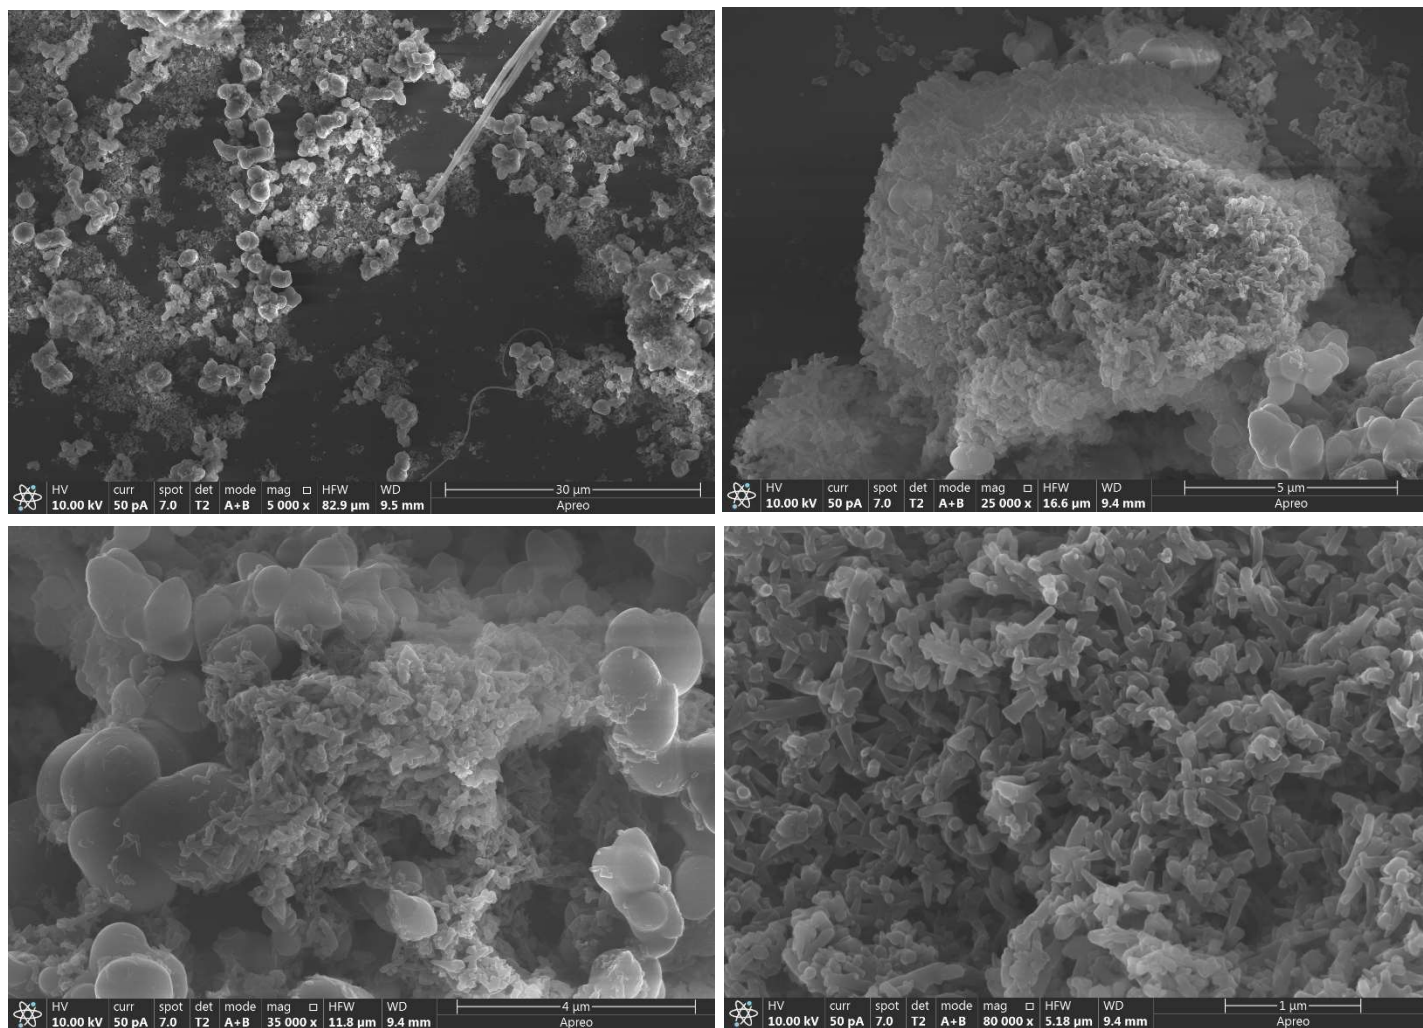

**Figure S15.** SEM images of the  $\text{NH}_4\text{CN}$  polymer synthesized at 170 °C with a reaction time of 90 min.

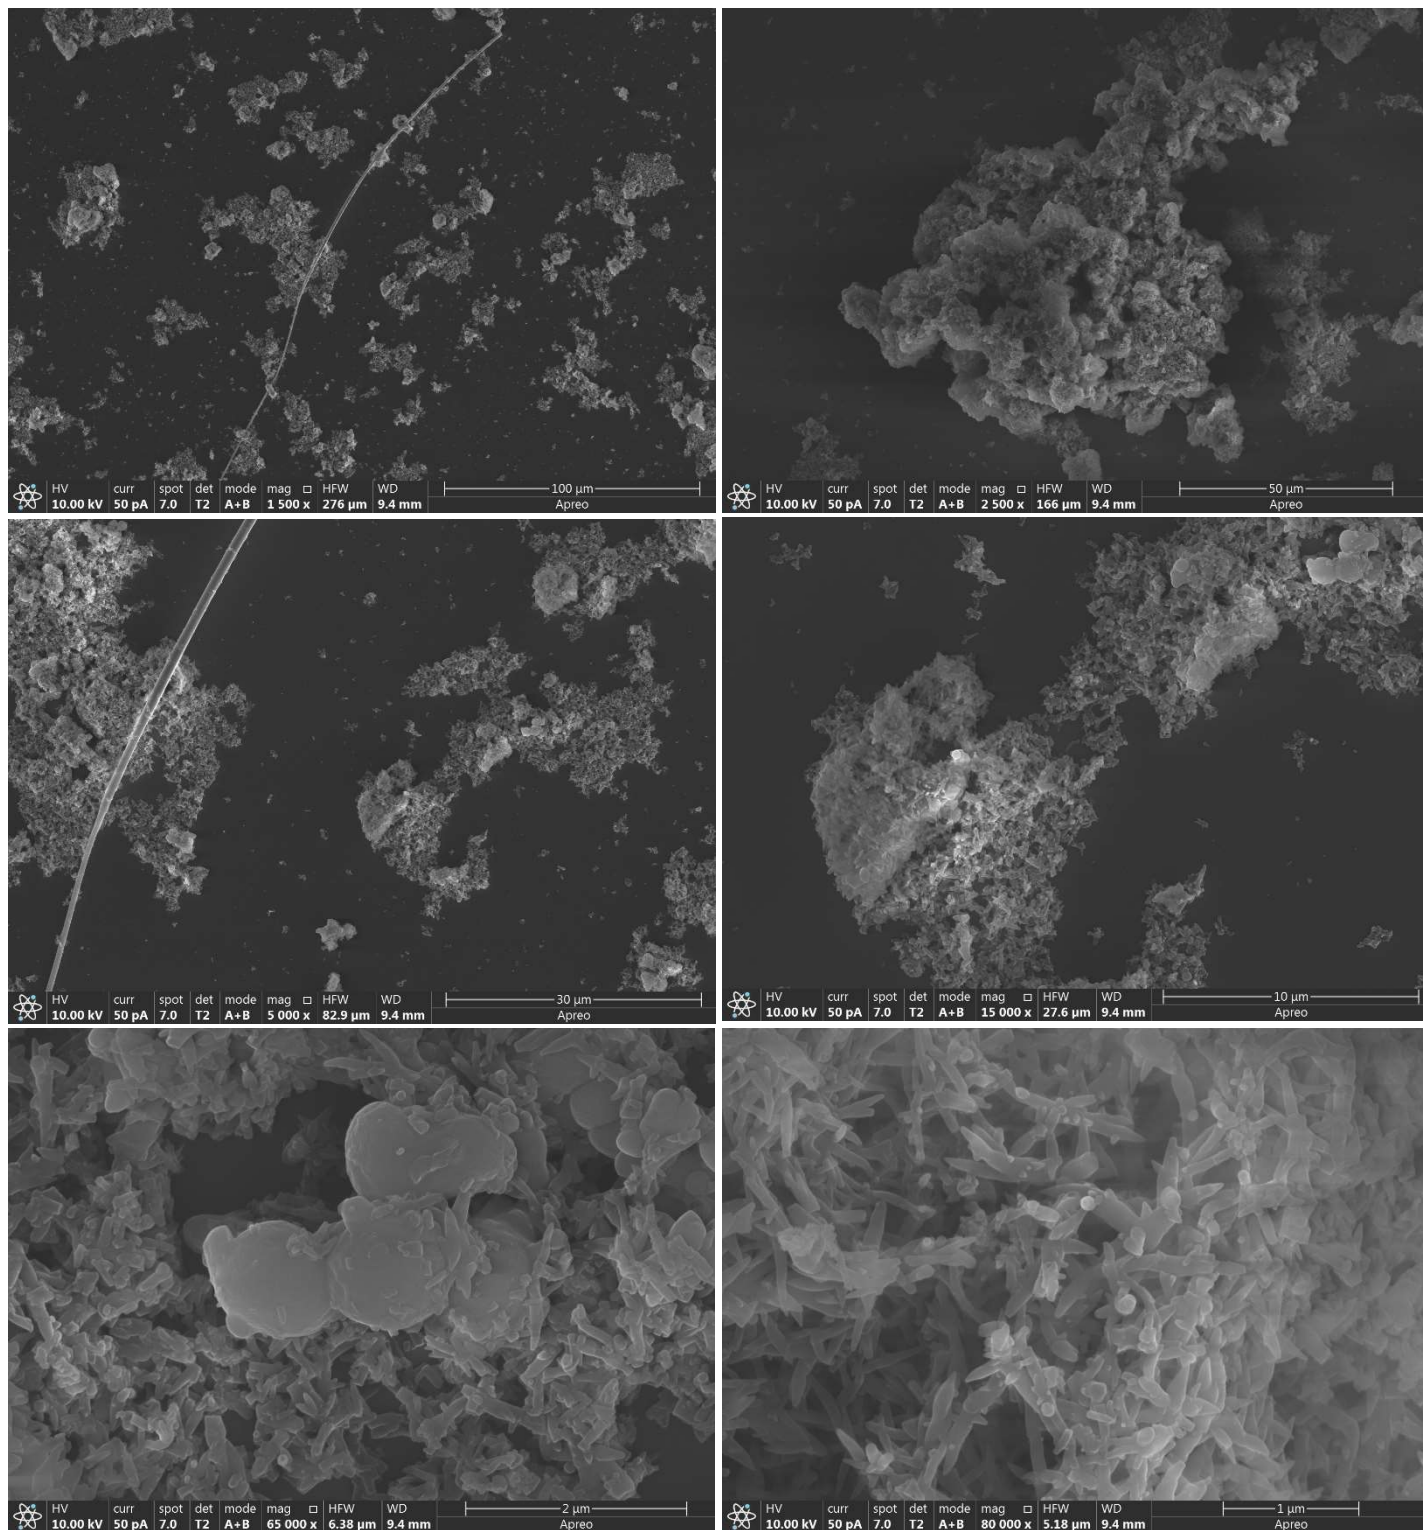

**Figure S16.** SEM images of the  $\text{NH}_4\text{CN}$  polymer synthesized at 170  $^{\circ}\text{C}$  with a reaction time of 105 min.

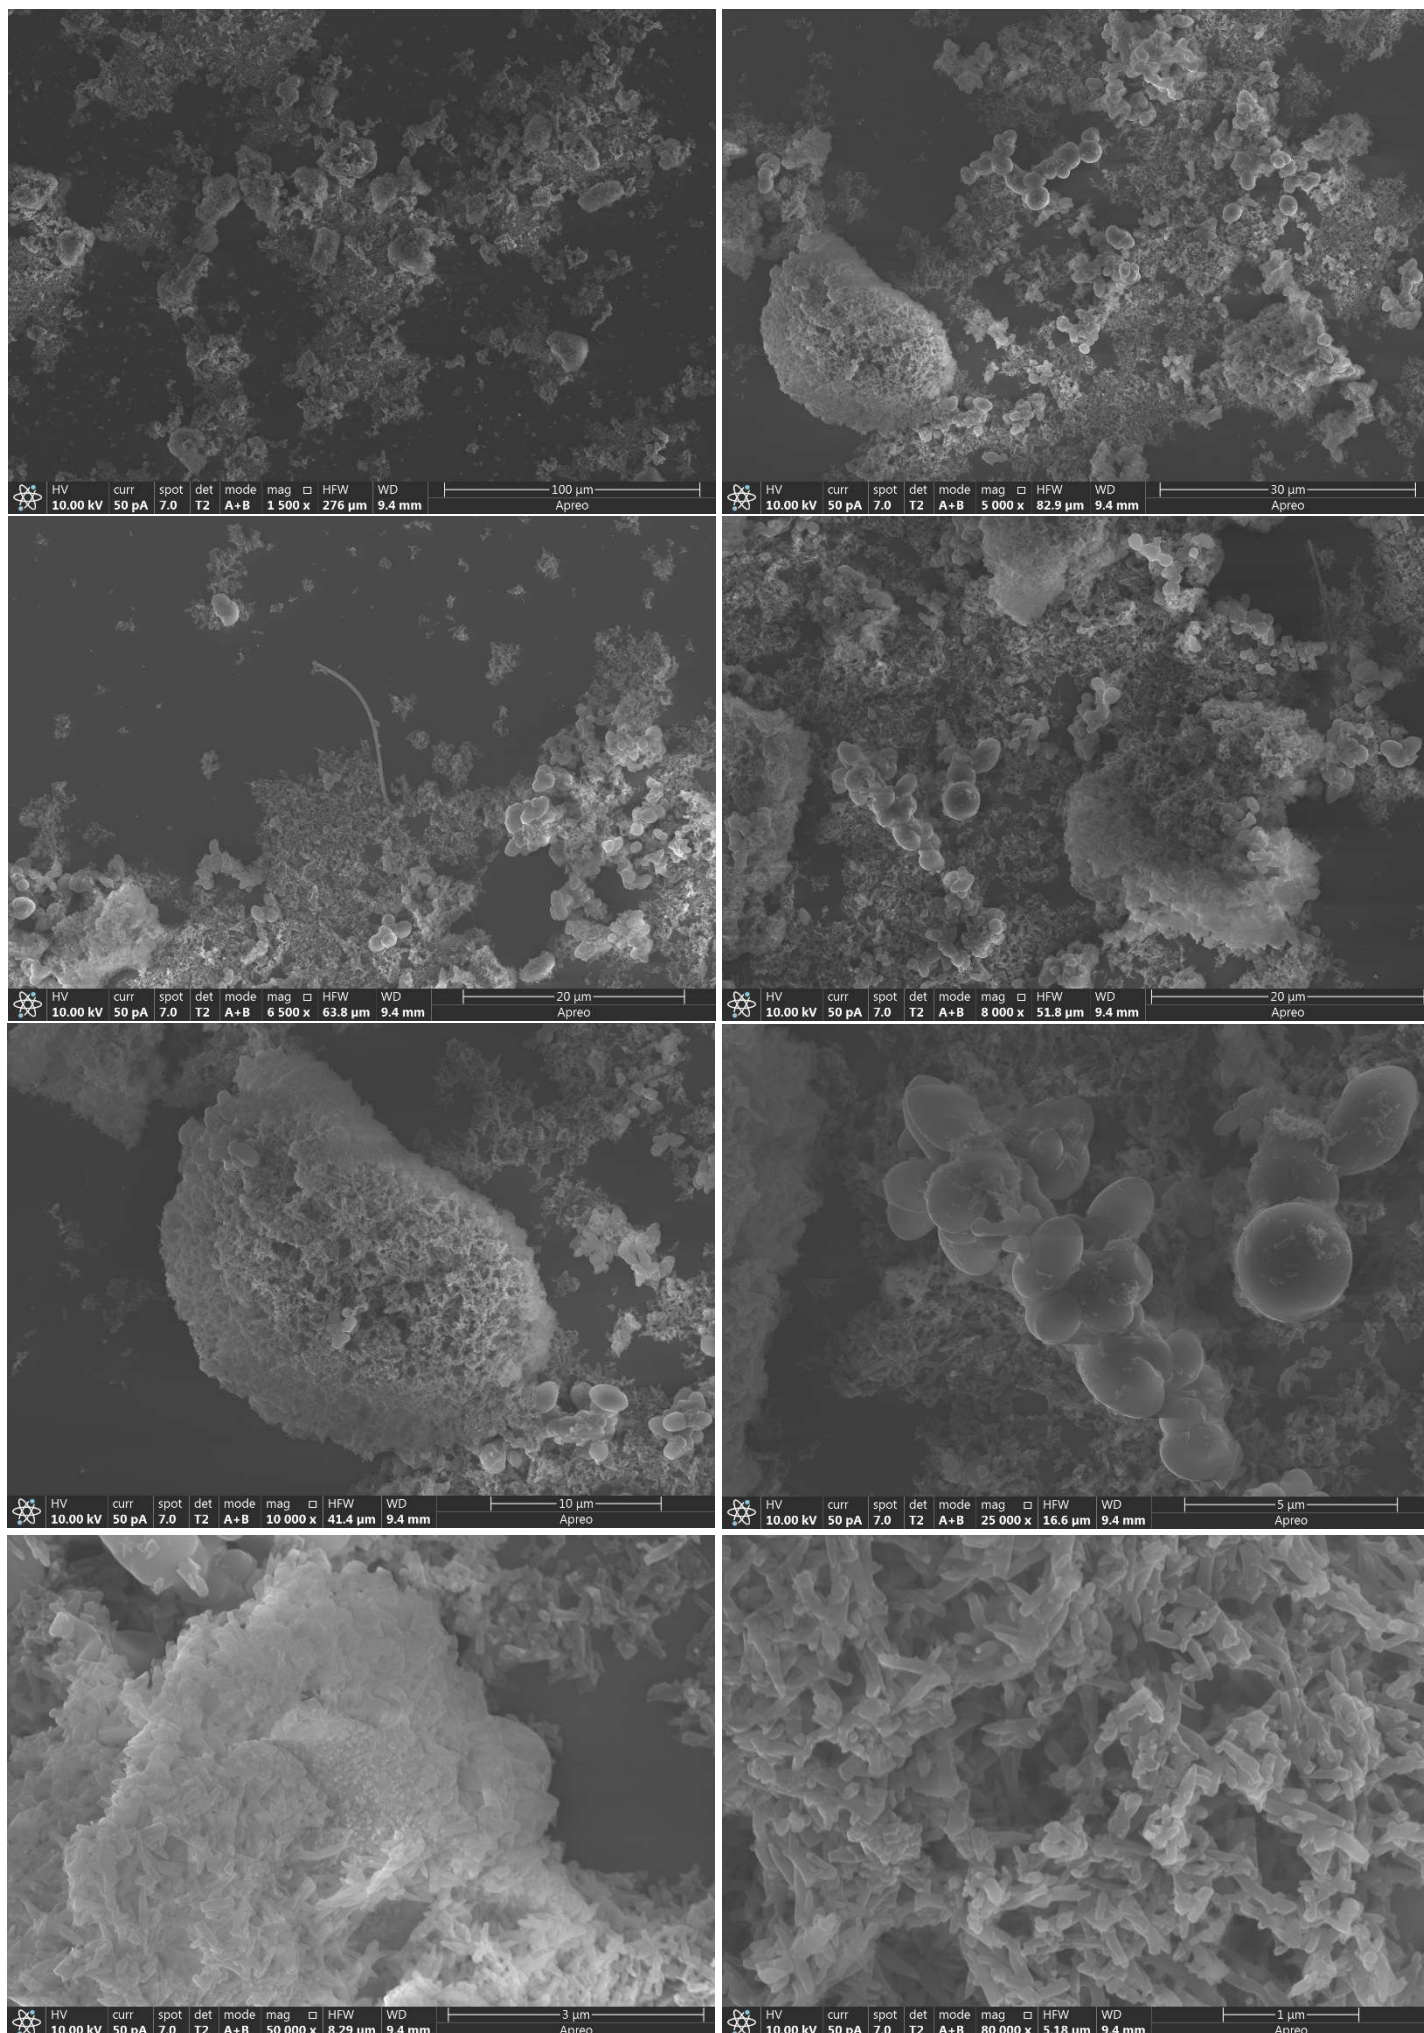

**Figure S17.** SEM images of the  $\text{NH}_4\text{CN}$  polymer synthesized at  $170^\circ\text{C}$  with a reaction time of 120 min.
